# Supplementary material for: The role of iron(ii) dilution in the magnetic and photomagnetic properties of the series [FexZn1−x(bpp)2](NCSe)2
Source: Royal Society of Chemistry journal article supplement (doi:10.1039/c3dt52964a), 2014-01-01
Supplement: c3dt52964a1.pdf [file c3dt52964a1.pdf]

## Role of Iron(II) Dilution in the Magnetic and Photomagnetic Properties of the Series $[\text{Fe}_x\text{Zn}_{1-x}(\text{bpp})_2](\text{NCSe})_2$

Chérif Baldé<sup>a,b</sup>, Cédric Desplanches<sup>a</sup>, Frédéric Le Gac<sup>a</sup>, Philippe Guionneau<sup>a</sup> and Jean-François Létard<sup>a</sup>

<sup>a</sup>CNRS, Université Bordeaux, ICMCB, Groupe des Sciences Moléculaires,  
87 Av. Doc. A. Schweitzer, F-33608 Pessac, France.  
Email: letard@icmcb-bordeaux.cnrs.fr

<sup>b</sup>Laboratoire de Chimie et Physique des Matériaux (LCPM) Université de Ziguinchor Bp: 523  
Ziguinchor- Sénégal. Fax: (+221) 339916809. Tel (+221) 339916809.  
Email: cbalde@univ-zig.sn

### Electronic Supplementary Information

**Figure SI.1** Room temperature powder X-ray diffraction patterns of  $[\text{Fe}_x\text{Zn}_{1-x}(\text{bpp})_2](\text{NCSe})_2$  ( $x = 1, 0.6$  and  $0$ )

**Table SI.1** : Elemental Analysis for the Mixed-Crystal complexes:  $[\text{Fe}_x\text{Zn}_{1-x}(\text{bpp})_2](\text{NCSe})_2$

- Details of the calculations for the kinetic studies.
- Structural Tables for the Mixed-Crystal complexe  $[\text{Fe}_{0.6}\text{Zn}_{0.4}(\text{bpp})_2](\text{NCSe})_2$  at 120 K and 298 K.

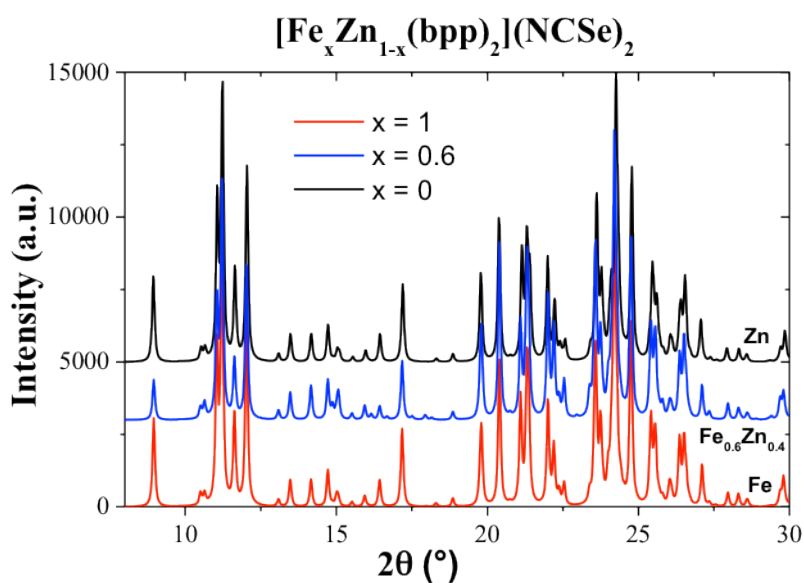

**Figure SI.1** Room temperature powder X-ray diffraction patterns of  $[\text{Fe}_x\text{Zn}_{1-x}(\text{bpp})_2](\text{NCSe})_2$  ( $x = 1, 0.6$  and  $0$ )

**Table SI.1** : Elemental Analysis for the Mixed-Crystal complexes:  $[\text{Fe}_x\text{Zn}_{1-x}(\text{bpp})_2](\text{NCSe})_2$

| Compound                                                                     | Calculate (% weight) |      |       | Experimental (% weight) |      |       |
|------------------------------------------------------------------------------|----------------------|------|-------|-------------------------|------|-------|
|                                                                              | C                    | H    | N     | C                       | H    | N     |
| <b>1</b> : $[\text{Fe}(\text{bpp})_2](\text{NCSe})_2$                        | 41,88                | 2,63 | 24,42 | 41,53                   | 2,62 | 24,50 |
| <b>2</b> : $[\text{Fe}_{0,8}\text{Zn}_{0,2}(\text{bpp})_2](\text{NCSe})_2$   | 41,76                | 2,62 | 24,35 | 41,40                   | 2,59 | 24,31 |
| <b>3</b> : $[\text{Fe}_{0,6}\text{Zn}_{0,4}(\text{bpp})_2](\text{NCSe})_2$   | 41,65                | 2,62 | 24,28 | 41,52                   | 2,61 | 24,48 |
| <b>4</b> : $[\text{Fe}_{0,45}\text{Zn}_{0,55}(\text{bpp})_2](\text{NCSe})_2$ | 41,56                | 2,61 | 24,23 | 41,13                   | 2,59 | 24,25 |
| <b>5</b> : $[\text{Fe}_{0,22}\text{Zn}_{0,78}(\text{bpp})_2](\text{NCSe})_2$ | 41,43                | 2,60 | 24,16 | 41,00                   | 2,58 | 24,23 |
| <b>6</b> : $[\text{Fe}_{0,11}\text{Zn}_{0,89}(\text{bpp})_2](\text{NCSe})_2$ | 41,37                | 2,60 | 24,12 | 40,82                   | 2,50 | 23,83 |

## Details of the calculations for the kinetic study.

The equations used in order to model the kinetic decay of the photoexcited HS state in the case of a cooperative system are recalled bellow:

$$\frac{\partial \gamma_{HS}}{\partial t} = -k_{HL}^* \gamma_{HS} \quad (1)$$

$$k_{HL}^*(T, \gamma_{HS}) = k_{HL}(T) \exp[\alpha(T)(1 - \gamma_{HS})] \quad (2)$$

$$k_{HL}(T) = k_0 + k_{\infty} \cdot \exp(-E_a / k_B T) \quad (3)$$

$$\frac{\partial \gamma_{HS}}{\partial t} = -\gamma_{HS} \left\{ k_0 + k_{\infty} \exp\left(-\frac{E_a}{k_B T}\right) \right\} \cdot \exp[\alpha(T)(1 - \gamma_{HS})] \quad (4)$$

All the simulations have been realized using Origin 5.0 program. At each temperature, a simulation is done using 3 parameters, namely  $\gamma_{HS}(t=0)$ ,  $\alpha(T)$  and  $k_{HL}(T)$ . Integration of the first two equations is realized numerically by Origin 5.0 program.

More precisely, in the Origin 5.0 program, a column of equally spaced  $\gamma_{HS}$  is created and the time at which a given  $\gamma_{HS}$  is reached is calculated using the integration function of the Origin 5.0 program and an integrated version of equations 1 and 2:

$$t = \int_{\gamma_{HS}(t=0)}^{\gamma_{HS}(t)} \frac{d\gamma_{HS}}{-k_{HL}(T) \exp[\alpha(T)(1 - \gamma_{HS})] \gamma_{HS}}$$

The Arrhenius plot of  $\ln(k_{HL}(T))$  versus  $1/T$  allows the determination of  $E_a$  and  $k_{\infty}$ .

In order to get a reasonable fitting, it has also been necessary to take into account a Gaussian distribution of activation energy. Due to numerical difficulties, it has not been possible to use an exact distribution of activation energies. Instead, a standard deviation  $\sigma$  has been chosen, and a relaxation curve has been simulated for different activation energy values, namely  $E_a - 3\sigma$ ,  $E_a - 2\sigma$ ,  $E_a - \sigma$ ,  $E_a$ ,  $E_a + \sigma$ ,  $E_a + 2\sigma$ ,  $E_a + 3\sigma$ . The 7 different curves have thus been summed using the following Gaussian weighting:  $E_a$  : 39.9 %,  $E_a \pm \sigma$  : 24.2 %,  $E_a \pm 2\sigma$  : 5.4 %,  $E_a \pm 3\sigma$  : 0.45 %.

The  $\sigma$  parameter has been determined through trial and error.

=====  
S U P P L E M E N T A R Y   M A T E R I A L  
=====  
B E L O N G I N G   T O   T H E   P A P E R

b y

C o n t e n t s  
=====

- Table S1 - Crystal Data and Details of the Structure Determination  
for: bpp120 in P -1
- Table S2 - Final Coordinates and Equivalent Isotropic Displacement  
Parameters of the non-Hydrogen atoms  
for: bpp120 in P -1
- Table S3 - Hydrogen Atom Positions and Isotropic Displacement  
Parameters  
for: bpp120 in P -1
- Table S4 - (An)isotropic Displacement Parameters  
for: bpp120 in P -1
- Table S5 - Bond Distances (Angstrom)  
for: bpp120 in P -1
- Table S6 - Bond Angles (Degrees)  
for: bpp120 in P -1
- Table S7 - Torsion Angles (Degrees)  
for: bpp120 in P -1
- Table S8 - Contact Distances(Angstrom)  
for: bpp120 in P -1
- Table S9 - Hydrogen Bonds (Angstrom, Deg)  
for: bpp120 in P -1

Table S1 - Crystal Data and Details of the Structure Determination  
for: bpp120 in P -1

| Crystal Data                        |                             |               |            |
|-------------------------------------|-----------------------------|---------------|------------|
| Formula                             |                             |               | ?          |
| Formula Weight                      |                             |               | 692.01     |
| Crystal System                      |                             |               | Triclinic  |
| Space group                         | P-1                         |               | (No. 2)    |
| a, b, c [Angstrom]                  | 8.2142(16)                  | 8.353(2)      | 19.855(4)  |
| alpha, beta, gamma [deg]            | 87.724(9)                   | 83.926(13)    | 88.701(13) |
| V [Ang**3]                          |                             |               | 1353.4(5)  |
| Z                                   |                             |               | 2          |
| D(calc) [g/cm**3]                   |                             |               | 1.698      |
| Mu(MoKa) [ /mm ]                    |                             |               | 3.423      |
| F(000)                              |                             |               | 683        |
| Crystal Size [mm]                   |                             | 0.00 x 0.00 x | 0.00       |
| Data Collection                     |                             |               |            |
| Temperature (K)                     |                             |               | *****      |
| Radiation [Angstrom]                | MoKa                        |               | 0.71073    |
| Theta Min-Max [Deg]                 |                             | 0.0,          | 0.0        |
| Dataset                             | 999:-99 ; 999:-99 ; 999:-99 |               |            |
| Tot., Uniq. Data, R(int)            | 0,                          | 0,            | 0.000      |
| Observed data [I > 0.0 sigma(I)]    |                             |               | 0          |
| Refinement                          |                             |               |            |
| Nref, Npar                          |                             | 0,            | 0          |
| R, wR2, S                           | 0.0000,                     | 0.0000,       | 0.00       |
| w =                                 |                             |               |            |
| Max. and Av. Shift/Error            |                             | 0.00,         | 0.00       |
| Min. and Max. Resd. Dens. [e/Ang^3] |                             | 0.00,         | 0.00       |

Table S2 - Final Coordinates and Equivalent Isotropic Displacement  
Parameters of the non-Hydrogen atoms  
for: bpp120 in P -1

| Atom | x          | y          | z           | U(eq) [Ang <sup>2</sup> ] |
|------|------------|------------|-------------|---------------------------|
| ---- | ---        | ---        | ---         | -----                     |
| *Fe1 | 0.71931(7) | 0.23222(7) | 0.24807(3)  | 0.0232(2)                 |
| *Zn1 | 0.71931(7) | 0.23222(7) | 0.24807(3)  | 0.0232(2)                 |
| N1   | 0.5686(5)  | 0.5897(5)  | 0.2447(3)   | 0.0435(17)                |
| N2   | 0.6233(5)  | 0.4510(5)  | 0.2172(2)   | 0.0297(12)                |
| N3   | 0.7233(4)  | 0.2137(5)  | 0.14795(19) | 0.0252(12)                |
| N4   | 0.8200(5)  | 0.0064(5)  | 0.2322(2)   | 0.0319(14)                |
| N5   | 0.8796(5)  | -0.1154(6) | 0.2690(3)   | 0.0477(17)                |
| N6   | 0.3684(6)  | 0.0704(5)  | 0.2626(3)   | 0.0442(17)                |
| N7   | 0.4957(5)  | 0.1408(5)  | 0.2856(2)   | 0.0319(14)                |
| N8   | 0.7205(5)  | 0.2514(5)  | 0.3479(2)   | 0.0284(12)                |
| N9   | 0.9443(5)  | 0.3288(5)  | 0.2560(2)   | 0.0306(12)                |
| N10  | 1.0767(5)  | 0.3725(5)  | 0.2147(3)   | 0.0450(17)                |
| C1   | 0.5228(7)  | 0.6935(7)  | 0.1977(4)   | 0.052(2)                  |
| C2   | 0.5467(6)  | 0.6235(6)  | 0.1354(3)   | 0.0408(19)                |
| C3   | 0.6098(6)  | 0.4702(6)  | 0.1505(3)   | 0.0290(17)                |
| C4   | 0.6651(6)  | 0.3349(6)  | 0.1097(3)   | 0.0280(17)                |
| C5   | 0.6621(6)  | 0.3220(7)  | 0.0406(3)   | 0.0349(17)                |
| C6   | 0.7205(7)  | 0.1821(7)  | 0.0107(3)   | 0.0402(19)                |
| C7   | 0.7830(6)  | 0.0590(7)  | 0.0494(3)   | 0.0368(17)                |
| C8   | 0.7829(6)  | 0.0780(6)  | 0.1186(2)   | 0.0270(17)                |
| C9   | 0.8424(6)  | -0.0374(6) | 0.1678(3)   | 0.0308(17)                |
| C10  | 0.9167(7)  | -0.1894(7) | 0.1639(4)   | 0.047(2)                  |
| C11  | 0.9366(7)  | -0.2350(7) | 0.2297(4)   | 0.057(3)                  |
| C12  | 0.2606(7)  | 0.0213(7)  | 0.3144(4)   | 0.055(3)                  |
| C13  | 0.3173(7)  | 0.0597(7)  | 0.3738(3)   | 0.045(2)                  |
| C14  | 0.4661(6)  | 0.1349(6)  | 0.3540(3)   | 0.0311(17)                |

Table S2 - Final Coordinates and Equivalent Isotropic Displacement  
Parameters of the non-Hydrogen atoms (continued)  
for: bpp120 in P -1

| Atom<br>---- | x<br>---   | y<br>---   | z<br>---   | U(eq) [Ang^2]<br>----- |
|--------------|------------|------------|------------|------------------------|
| C15          | 0.5910(6)  | 0.2029(6)  | 0.3902(3)  | 0.0305(17)             |
| C16          | 0.5854(7)  | 0.2174(7)  | 0.4599(3)  | 0.0407(19)             |
| C17          | 0.7179(7)  | 0.2847(7)  | 0.4851(3)  | 0.046(2)               |
| C18          | 0.8534(7)  | 0.3320(7)  | 0.4419(3)  | 0.0412(17)             |
| C19          | 0.8500(6)  | 0.3154(6)  | 0.3731(3)  | 0.0309(17)             |
| C20          | 0.9791(6)  | 0.3583(6)  | 0.3190(3)  | 0.0303(17)             |
| C21          | 1.1365(7)  | 0.4204(7)  | 0.3169(4)  | 0.048(2)               |
| C22          | 1.1943(7)  | 0.4278(7)  | 0.2497(4)  | 0.056(3)               |
| Se1          | 0.86428(8) | 0.80986(8) | 0.43577(3) | 0.0544(3)              |
| N11          | 0.5915(7)  | 0.6505(6)  | 0.3802(3)  | 0.0538(19)             |
| C23          | 0.6990(8)  | 0.7101(7)  | 0.4028(3)  | 0.044(2)               |
| Se2          | 0.16967(8) | 0.32871(8) | 0.04954(3) | 0.0512(2)              |
| N12          | 0.3294(6)  | 0.0659(7)  | 0.1246(3)  | 0.0532(19)             |
| C24          | 0.2703(7)  | 0.1677(8)  | 0.0947(3)  | 0.043(2)               |

U(eq) = 1/3 of the trace of the orthogonalized U Tensor

Starred Atom sites have a S.O.F less than 1.0

Table S3 - Hydrogen Atom Positions and Isotropic Displacement  
Parameters  
for: bpp120 in P -1

| Atom | x       | y        | z        | U(iso) [Ang <sup>2</sup> ] |
|------|---------|----------|----------|----------------------------|
| ---- | ---     | ---      | ---      | -----                      |
| H1   | 0.48046 | 0.79867  | 0.20560  | 0.0619                     |
| H1N  | 0.56392 | 0.60878  | 0.28810  | 0.0521                     |
| H2   | 0.52537 | 0.66845  | 0.09242  | 0.0489                     |
| H5   | 0.62057 | 0.40762  | 0.01408  | 0.0419                     |
| H5N  | 0.88097 | -0.11639 | 0.31324  | 0.0567                     |
| H6   | 0.71764 | 0.17076  | -0.03656 | 0.0482                     |
| H6N  | 0.35709 | 0.05818  | 0.21952  | 0.0533                     |
| H7   | 0.82516 | -0.03652 | 0.02918  | 0.0441                     |
| H10  | 0.94693 | -0.24816 | 0.12441  | 0.0560                     |
| H10N | 1.08573 | 0.36597  | 0.17033  | 0.0538                     |
| H11  | 0.98256 | -0.33376 | 0.24471  | 0.0689                     |
| H12  | 0.16105 | -0.03160 | 0.31035  | 0.0663                     |
| H13  | 0.26694 | 0.03980  | 0.41858  | 0.0543                     |
| H16  | 0.49342 | 0.18216  | 0.48934  | 0.0487                     |
| H17  | 0.71597 | 0.29854  | 0.53241  | 0.0541                     |
| H18  | 0.94622 | 0.37465  | 0.45914  | 0.0491                     |
| H21  | 1.19121 | 0.45092  | 0.35410  | 0.0573                     |
| H22  | 1.29849 | 0.46507  | 0.23107  | 0.0673                     |

=====  
The Temperature Factor has the Form of  $\text{Exp}(-T)$  Where  
 $T = 8 * (\text{Pi}^{**2}) * U * (\text{Sin}(\text{Theta}) / \text{Lambda})^{**2}$  for Isotropic Atoms



Table S4 - (An)isotropic Displacement Parameters  
for: bpp120 in P -1

| Atom | U(1,1) or U | U(2,2)    | U(3,3)    | U(2,3)      | U(1,3)      | U(1,2)      |
|------|-------------|-----------|-----------|-------------|-------------|-------------|
| ---- | -----       | -----     | -----     | -----       | -----       | -----       |
| Fe1  | 0.0204(4)   | 0.0234(4) | 0.0258(3) | -0.0012(3)  | -0.0027(3)  | 0.0033(3)   |
| Zn1  | 0.0204(4)   | 0.0234(4) | 0.0258(3) | -0.0012(3)  | -0.0027(3)  | 0.0033(3)   |
| N1   | 0.030(3)    | 0.035(3)  | 0.065(3)  | -0.021(3)   | 0.005(2)    | -0.002(2)   |
| N2   | 0.024(2)    | 0.024(2)  | 0.041(2)  | -0.0108(19) | 0.0004(18)  | -0.0021(18) |
| N3   | 0.019(2)    | 0.020(2)  | 0.036(2)  | -0.0001(18) | -0.0005(17) | -0.0012(17) |
| N4   | 0.022(2)    | 0.031(3)  | 0.043(2)  | 0.010(2)    | -0.0086(19) | -0.0034(19) |
| N5   | 0.037(3)    | 0.040(3)  | 0.068(3)  | 0.030(3)    | -0.025(3)   | -0.010(2)   |
| N6   | 0.036(3)    | 0.033(3)  | 0.069(3)  | -0.016(2)   | -0.027(3)   | 0.009(2)    |
| N7   | 0.028(2)    | 0.024(2)  | 0.046(3)  | -0.004(2)   | -0.016(2)   | 0.0081(19)  |
| N8   | 0.027(2)    | 0.020(2)  | 0.038(2)  | 0.0022(18)  | -0.0050(19) | 0.0047(19)  |
| N9   | 0.025(2)    | 0.024(2)  | 0.040(2)  | 0.0054(19)  | 0.0067(19)  | 0.0048(19)  |
| N10  | 0.035(3)    | 0.034(3)  | 0.060(3)  | 0.005(2)    | 0.019(2)    | 0.005(2)    |
| C1   | 0.032(3)    | 0.026(4)  | 0.096(5)  | -0.010(3)   | 0.002(3)    | 0.008(3)    |
| C2   | 0.029(3)    | 0.026(3)  | 0.068(4)  | 0.003(3)    | -0.009(3)   | -0.003(2)   |
| C3   | 0.025(3)    | 0.022(3)  | 0.041(3)  | 0.001(2)    | -0.010(2)   | 0.002(2)    |
| C4   | 0.022(3)    | 0.023(3)  | 0.039(3)  | 0.001(2)    | -0.004(2)   | 0.000(2)    |
| C5   | 0.037(3)    | 0.036(3)  | 0.032(3)  | 0.003(2)    | -0.007(2)   | 0.000(3)    |
| C6   | 0.039(3)    | 0.050(4)  | 0.032(3)  | -0.008(3)   | -0.003(2)   | -0.002(3)   |
| C7   | 0.038(3)    | 0.032(3)  | 0.041(3)  | -0.008(2)   | -0.005(2)   | 0.004(3)    |
| C8   | 0.022(3)    | 0.023(3)  | 0.036(3)  | -0.003(2)   | -0.002(2)   | 0.000(2)    |
| C9   | 0.024(3)    | 0.021(3)  | 0.048(3)  | 0.001(2)    | -0.007(2)   | 0.000(2)    |
| C10  | 0.034(3)    | 0.025(3)  | 0.082(5)  | -0.006(3)   | -0.013(3)   | 0.003(3)    |
| C11  | 0.035(4)    | 0.020(4)  | 0.120(6)  | 0.015(4)    | -0.028(4)   | -0.003(3)   |
| C12  | 0.029(3)    | 0.025(4)  | 0.113(6)  | -0.009(4)   | -0.013(4)   | 0.002(3)    |
| C13  | 0.032(3)    | 0.033(4)  | 0.069(4)  | -0.003(3)   | 0.001(3)    | 0.001(3)    |
| C14  | 0.025(3)    | 0.022(3)  | 0.046(3)  | 0.001(2)    | -0.005(2)   | 0.005(2)    |

Table S4 - (An)isotropic Displacement Parameters (continued)  
for: bpp120 in P -1

| Atom | U(1,1) or U | U(2,2)    | U(3,3)    | U(2,3)     | U(1,3)     | U(1,2)     |
|------|-------------|-----------|-----------|------------|------------|------------|
| C15  | 0.030(3)    | 0.022(3)  | 0.038(3)  | 0.003(2)   | 0.001(2)   | 0.001(2)   |
| C16  | 0.042(3)    | 0.041(4)  | 0.037(3)  | 0.002(3)   | 0.002(3)   | 0.007(3)   |
| C17  | 0.054(4)    | 0.049(4)  | 0.035(3)  | 0.003(3)   | -0.015(3)  | 0.005(3)   |
| C18  | 0.042(3)    | 0.036(3)  | 0.048(3)  | 0.001(3)   | -0.018(3)  | 0.002(3)   |
| C19  | 0.029(3)    | 0.025(3)  | 0.040(3)  | -0.003(2)  | -0.011(2)  | 0.009(2)   |
| C20  | 0.026(3)    | 0.022(3)  | 0.043(3)  | 0.000(2)   | -0.007(2)  | 0.008(2)   |
| C21  | 0.025(3)    | 0.028(3)  | 0.093(5)  | 0.005(3)   | -0.018(3)  | 0.004(3)   |
| C22  | 0.025(3)    | 0.036(4)  | 0.106(6)  | 0.004(4)   | 0.001(3)   | -0.003(3)  |
| Se1  | 0.0558(4)   | 0.0621(5) | 0.0469(4) | -0.0065(3) | -0.0137(3) | 0.0087(3)  |
| N11  | 0.052(3)    | 0.057(4)  | 0.051(3)  | -0.014(3)  | 0.004(3)   | 0.005(3)   |
| C23  | 0.052(4)    | 0.048(4)  | 0.029(3)  | -0.001(3)  | 0.001(3)   | 0.016(3)   |
| Se2  | 0.0548(4)   | 0.0481(4) | 0.0502(4) | -0.0031(3) | -0.0010(3) | -0.0067(3) |
| N12  | 0.053(3)    | 0.050(4)  | 0.059(3)  | -0.018(3)  | -0.011(3)  | -0.001(3)  |
| C24  | 0.042(4)    | 0.043(4)  | 0.044(3)  | -0.015(3)  | 0.004(3)   | -0.009(3)  |

=====

The Temperature Factor has the Form of  $\text{Exp}(-T)$  Where  
 $T = 8 \cdot (\text{Pi}^2) \cdot U \cdot (\text{Sin}(\text{Theta}) / \text{Lambda})^2$  for Isotropic Atoms  
 $T = 2 \cdot (\text{Pi}^2) \cdot \text{Sum}_{ij} (h(i) \cdot h(j) \cdot U(i,j) \cdot \text{Astar}(i) \cdot \text{Astar}(j))$ , for  
Anisotropic Atoms.  $\text{Astar}(i)$  are Reciprocal Axial Lengths and  
 $h(i)$  are the Reflection Indices.

Table S5 - Bond Distances (Angstrom)  
for: bpp120 in P -1

|     |      |          |     |       |           |
|-----|------|----------|-----|-------|-----------|
| Se1 | -C23 | 1.802(6) | N9  | -N10  | 1.339(6)  |
| Se2 | -C24 | 1.818(6) | N10 | -C22  | 1.348(8)  |
| Zn1 | -N4  | 2.065(4) | N1  | -H1N  | 0.8800    |
| Zn1 | -N3  | 1.997(4) | N5  | -H5N  | 0.8800    |
| Zn1 | -N9  | 2.057(4) | N6  | -H6N  | 0.8800    |
| Zn1 | -N7  | 2.059(4) | N10 | -H10N | 0.8800    |
| Zn1 | -N2  | 2.070(4) | N11 | -C23  | 1.162(9)  |
| Zn1 | -N8  | 1.996(4) | N12 | -C24  | 1.146(8)  |
| Fe1 | -N3  | 1.997(4) | C1  | -C2   | 1.383(9)  |
| Fe1 | -N4  | 2.065(4) | C2  | -C3   | 1.404(7)  |
| Fe1 | -N2  | 2.070(4) | C3  | -C4   | 1.453(8)  |
| Fe1 | -N8  | 1.996(4) | C4  | -C5   | 1.383(8)  |
| Fe1 | -N9  | 2.057(4) | C5  | -C6   | 1.385(8)  |
| Fe1 | -N7  | 2.059(4) | C6  | -C7   | 1.381(8)  |
| N1  | -C1  | 1.326(9) | C7  | -C8   | 1.389(7)  |
| N1  | -N2  | 1.348(6) | C8  | -C9   | 1.459(7)  |
| N2  | -C3  | 1.344(7) | C9  | -C10  | 1.398(8)  |
| N3  | -C8  | 1.353(6) | C10 | -C11  | 1.372(11) |
| N3  | -C4  | 1.351(7) | C12 | -C13  | 1.365(9)  |
| N4  | -C9  | 1.337(7) | C13 | -C14  | 1.399(8)  |
| N4  | -N5  | 1.343(7) | C14 | -C15  | 1.452(7)  |
| N5  | -C11 | 1.338(8) | C15 | -C16  | 1.390(8)  |
| N6  | -C12 | 1.342(9) | C16 | -C17  | 1.384(8)  |
| N6  | -N7  | 1.341(6) | C17 | -C18  | 1.386(8)  |
| N7  | -C14 | 1.353(7) | C18 | -C19  | 1.382(8)  |
| N8  | -C19 | 1.352(7) | C19 | -C20  | 1.467(8)  |
| N8  | -C15 | 1.343(7) | C20 | -C21  | 1.400(8)  |
| N9  | -C20 | 1.346(7) | C21 | -C22  | 1.368(11) |

Table S5 - Bond Distances (Angstrom) (continued)  
for: bpp120 in P -1

|     |      |        |     |      |        |
|-----|------|--------|-----|------|--------|
| C1  | -H1  | 0.9500 | C12 | -H12 | 0.9500 |
| C2  | -H2  | 0.9500 | C13 | -H13 | 0.9500 |
| C5  | -H5  | 0.9500 | C16 | -H16 | 0.9500 |
| C6  | -H6  | 0.9500 | C17 | -H17 | 0.9500 |
| C7  | -H7  | 0.9500 | C18 | -H18 | 0.9500 |
| C10 | -H10 | 0.9500 | C21 | -H21 | 0.9500 |
| C11 | -H11 | 0.9500 | C22 | -H22 | 0.9500 |

Table S6 - Bond Angles (Degrees)  
for: bpp120 in P -1

|    |      |     |            |     |      |      |            |
|----|------|-----|------------|-----|------|------|------------|
| N2 | -Zn1 | -N3 | 76.90(16)  | N7  | -Fe1 | -N9  | 154.55(16) |
| N2 | -Zn1 | -N4 | 154.04(16) | N8  | -Fe1 | -N9  | 77.07(16)  |
| N2 | -Zn1 | -N7 | 94.53(16)  | N2  | -N1  | -C1  | 111.1(5)   |
| N2 | -Zn1 | -N8 | 103.41(17) | Fe1 | -N2  | -N1  | 138.6(4)   |
| N2 | -Zn1 | -N9 | 92.14(16)  | Fe1 | -N2  | -C3  | 115.6(3)   |
| N3 | -Zn1 | -N4 | 77.15(16)  | Zn1 | -N2  | -N1  | 138.6(4)   |
| N3 | -Zn1 | -N7 | 103.69(15) | Zn1 | -N2  | -C3  | 115.6(3)   |
| N3 | -Zn1 | -N8 | 178.77(16) | N1  | -N2  | -C3  | 105.8(4)   |
| N3 | -Zn1 | -N9 | 101.74(15) | Fe1 | -N3  | -C4  | 120.4(3)   |
| N4 | -Zn1 | -N7 | 92.28(16)  | Fe1 | -N3  | -C8  | 119.6(3)   |
| N4 | -Zn1 | -N8 | 102.52(16) | Zn1 | -N3  | -C4  | 120.4(3)   |
| N4 | -Zn1 | -N9 | 92.38(17)  | Zn1 | -N3  | -C8  | 119.6(3)   |
| N7 | -Zn1 | -N8 | 77.50(16)  | C4  | -N3  | -C8  | 120.0(4)   |
| N7 | -Zn1 | -N9 | 154.55(16) | Fe1 | -N4  | -N5  | 138.0(4)   |
| N8 | -Zn1 | -N9 | 77.07(16)  | Fe1 | -N4  | -C9  | 116.1(3)   |
| N2 | -Fe1 | -N3 | 76.90(16)  | Zn1 | -N4  | -N5  | 138.0(4)   |
| N2 | -Fe1 | -N4 | 154.04(16) | Zn1 | -N4  | -C9  | 116.1(3)   |
| N2 | -Fe1 | -N7 | 94.53(16)  | N5  | -N4  | -C9  | 105.9(4)   |
| N2 | -Fe1 | -N8 | 103.41(17) | N4  | -N5  | -C11 | 111.3(5)   |
| N2 | -Fe1 | -N9 | 92.14(16)  | N7  | -N6  | -C12 | 110.5(5)   |
| N3 | -Fe1 | -N4 | 77.15(16)  | Fe1 | -N7  | -N6  | 138.7(4)   |
| N3 | -Fe1 | -N7 | 103.69(15) | Fe1 | -N7  | -C14 | 115.0(3)   |
| N3 | -Fe1 | -N8 | 178.77(16) | Zn1 | -N7  | -N6  | 138.7(4)   |
| N3 | -Fe1 | -N9 | 101.74(15) | Zn1 | -N7  | -C14 | 115.0(3)   |
| N4 | -Fe1 | -N7 | 92.28(16)  | N6  | -N7  | -C14 | 106.1(4)   |
| N4 | -Fe1 | -N8 | 102.52(16) | Fe1 | -N8  | -C15 | 119.9(3)   |
| N4 | -Fe1 | -N9 | 92.38(17)  | Fe1 | -N8  | -C19 | 120.3(4)   |
| N7 | -Fe1 | -N8 | 77.50(16)  | Zn1 | -N8  | -C15 | 119.9(3)   |

Table S6 - Bond Angles (Degrees) (continued)  
for: bpp120 in P -1

|     |      |       |          |     |      |      |          |
|-----|------|-------|----------|-----|------|------|----------|
| Zn1 | -N8  | -C19  | 120.3(4) | N3  | -C8  | -C7  | 121.2(4) |
| C15 | -N8  | -C19  | 119.8(4) | N3  | -C8  | -C9  | 112.0(4) |
| Fe1 | -N9  | -N10  | 137.9(3) | N4  | -C9  | -C10 | 110.3(5) |
| Fe1 | -N9  | -C20  | 116.4(3) | C8  | -C9  | -C10 | 134.6(6) |
| Zn1 | -N9  | -N10  | 137.9(3) | N4  | -C9  | -C8  | 115.1(4) |
| Zn1 | -N9  | -C20  | 116.4(3) | C9  | -C10 | -C11 | 104.8(6) |
| N10 | -N9  | -C20  | 105.7(4) | N5  | -C11 | -C10 | 107.7(5) |
| N9  | -N10 | -C22  | 111.4(5) | N6  | -C12 | -C13 | 108.9(5) |
| N2  | -N1  | -H1N  | 124.00   | C12 | -C13 | -C14 | 104.6(5) |
| C1  | -N1  | -H1N  | 124.00   | N7  | -C14 | -C13 | 110.0(5) |
| N4  | -N5  | -H5N  | 124.00   | N7  | -C14 | -C15 | 115.7(5) |
| C11 | -N5  | -H5N  | 124.00   | C13 | -C14 | -C15 | 134.3(5) |
| N7  | -N6  | -H6N  | 125.00   | N8  | -C15 | -C14 | 111.8(5) |
| C12 | -N6  | -H6N  | 125.00   | N8  | -C15 | -C16 | 121.7(5) |
| N9  | -N10 | -H10N | 124.00   | C14 | -C15 | -C16 | 126.5(5) |
| C22 | -N10 | -H10N | 124.00   | C15 | -C16 | -C17 | 118.0(5) |
| N1  | -C1  | -C2   | 108.8(5) | C16 | -C17 | -C18 | 120.6(5) |
| C1  | -C2  | -C3   | 103.8(5) | C17 | -C18 | -C19 | 118.3(5) |
| N2  | -C3  | -C2   | 110.5(5) | N8  | -C19 | -C20 | 111.4(5) |
| N2  | -C3  | -C4   | 115.7(5) | C18 | -C19 | -C20 | 127.0(5) |
| C2  | -C3  | -C4   | 133.8(5) | N8  | -C19 | -C18 | 121.6(5) |
| N3  | -C4  | -C3   | 111.4(5) | N9  | -C20 | -C19 | 114.8(4) |
| N3  | -C4  | -C5   | 121.1(5) | N9  | -C20 | -C21 | 110.2(5) |
| C3  | -C4  | -C5   | 127.5(5) | C19 | -C20 | -C21 | 134.9(6) |
| C4  | -C5  | -C6   | 118.9(5) | C20 | -C21 | -C22 | 105.0(6) |
| C5  | -C6  | -C7   | 120.2(5) | N10 | -C22 | -C21 | 107.6(5) |
| C6  | -C7  | -C8   | 118.6(5) | N1  | -C1  | -H1  | 126.00   |
| C7  | -C8  | -C9   | 126.9(5) | C2  | -C1  | -H1  | 126.00   |

Table S6 - Bond Angles (Degrees) (continued)  
for: bpp120 in P -1

|     |      |      |        |     |      |      |          |
|-----|------|------|--------|-----|------|------|----------|
| C1  | -C2  | -H2  | 128.00 | C12 | -C13 | -H13 | 128.00   |
| C3  | -C2  | -H2  | 128.00 | C14 | -C13 | -H13 | 128.00   |
| C4  | -C5  | -H5  | 121.00 | C15 | -C16 | -H16 | 121.00   |
| C6  | -C5  | -H5  | 121.00 | C17 | -C16 | -H16 | 121.00   |
| C5  | -C6  | -H6  | 120.00 | C16 | -C17 | -H17 | 120.00   |
| C7  | -C6  | -H6  | 120.00 | C18 | -C17 | -H17 | 120.00   |
| C6  | -C7  | -H7  | 121.00 | C17 | -C18 | -H18 | 121.00   |
| C8  | -C7  | -H7  | 121.00 | C19 | -C18 | -H18 | 121.00   |
| C9  | -C10 | -H10 | 128.00 | C20 | -C21 | -H21 | 127.00   |
| C11 | -C10 | -H10 | 128.00 | C22 | -C21 | -H21 | 127.00   |
| N5  | -C11 | -H11 | 126.00 | N10 | -C22 | -H22 | 126.00   |
| C10 | -C11 | -H11 | 126.00 | C21 | -C22 | -H22 | 126.00   |
| N6  | -C12 | -H12 | 126.00 | Se1 | -C23 | -N11 | 177.7(6) |
| C13 | -C12 | -H12 | 126.00 | Se2 | -C24 | -N12 | 177.8(5) |

Table S7 - Torsion Angles (Degrees)  
for: bpp120 in P -1

|    |      |     |      |           |
|----|------|-----|------|-----------|
| N9 | -Fe1 | -N3 | -C4  | -91.0(4)  |
| N2 | -Fe1 | -N3 | -C8  | 179.3(4)  |
| N3 | -Fe1 | -N2 | -N1  | -177.9(5) |
| N4 | -Fe1 | -N2 | -N1  | -176.2(4) |
| N7 | -Fe1 | -N2 | -N1  | 79.1(5)   |
| N8 | -Fe1 | -N2 | -N1  | 0.9(5)    |
| N9 | -Fe1 | -N2 | -N1  | -76.4(5)  |
| N3 | -Fe1 | -N2 | -C3  | 0.9(3)    |
| N4 | -Fe1 | -N2 | -C3  | 2.6(6)    |
| N7 | -Fe1 | -N2 | -C3  | -102.1(4) |
| N8 | -Fe1 | -N2 | -C3  | 179.7(3)  |
| N9 | -Fe1 | -N2 | -C3  | 102.5(4)  |
| N2 | -Fe1 | -N3 | -C4  | -1.6(3)   |
| N4 | -Fe1 | -N3 | -C4  | 179.2(4)  |
| N7 | -Fe1 | -N3 | -C4  | 90.0(4)   |
| N8 | -Fe1 | -N9 | -C20 | -1.1(4)   |
| N7 | -Fe1 | -N8 | -C15 | -0.2(4)   |
| N4 | -Fe1 | -N3 | -C8  | 0.0(3)    |
| N7 | -Fe1 | -N3 | -C8  | -89.2(3)  |
| N9 | -Fe1 | -N3 | -C8  | 89.8(4)   |
| N2 | -Fe1 | -N4 | -N5  | 176.7(4)  |
| N3 | -Fe1 | -N4 | -N5  | 178.4(5)  |
| N7 | -Fe1 | -N4 | -N5  | -78.1(5)  |
| N8 | -Fe1 | -N4 | -N5  | -0.4(5)   |
| N9 | -Fe1 | -N4 | -N5  | 76.9(5)   |
| N2 | -Fe1 | -N4 | -C9  | 0.3(6)    |
| N3 | -Fe1 | -N4 | -C9  | 2.0(3)    |
| N7 | -Fe1 | -N4 | -C9  | 105.5(4)  |



Table S7 - Torsion Angles (Degrees) (continued)  
for: bpp120 in P -1

|    |      |     |      |           |
|----|------|-----|------|-----------|
| N8 | -Fe1 | -N4 | -C9  | -176.8(4) |
| N9 | -Fe1 | -N4 | -C9  | -99.5(4)  |
| N4 | -Fe1 | -N8 | -C15 | -89.8(4)  |
| N9 | -Fe1 | -N7 | -N6  | -173.2(4) |
| N9 | -Fe1 | -N8 | -C15 | -179.4(4) |
| N2 | -Fe1 | -N8 | -C19 | -87.4(4)  |
| N2 | -Fe1 | -N7 | -N6  | 82.2(5)   |
| N3 | -Fe1 | -N7 | -N6  | 4.6(5)    |
| N4 | -Fe1 | -N7 | -N6  | -72.8(5)  |
| N8 | -Fe1 | -N7 | -N6  | -175.1(5) |
| N7 | -Fe1 | -N9 | -C20 | -3.0(6)   |
| N2 | -Fe1 | -N7 | -C14 | -104.8(4) |
| N3 | -Fe1 | -N7 | -C14 | 177.7(3)  |
| N4 | -Fe1 | -N7 | -C14 | 100.3(4)  |
| N8 | -Fe1 | -N7 | -C14 | -2.0(3)   |
| N9 | -Fe1 | -N7 | -C14 | -0.1(6)   |
| N2 | -Fe1 | -N8 | -C15 | 91.5(4)   |
| N2 | -Fe1 | -N9 | -N10 | -78.9(5)  |
| N3 | -Fe1 | -N9 | -N10 | -1.9(5)   |
| N4 | -Fe1 | -N9 | -N10 | 75.5(5)   |
| N7 | -Fe1 | -N9 | -N10 | 175.9(4)  |
| N4 | -Fe1 | -N8 | -C19 | 91.3(4)   |
| N7 | -Fe1 | -N8 | -C19 | -179.2(4) |
| N9 | -Fe1 | -N8 | -C19 | 1.7(4)    |
| N4 | -Fe1 | -N9 | -C20 | -103.4(4) |
| N8 | -Fe1 | -N9 | -N10 | 177.8(5)  |
| N2 | -Fe1 | -N9 | -C20 | 102.2(4)  |
| N3 | -Fe1 | -N9 | -C20 | 179.2(4)  |

Table S7 - Torsion Angles (Degrees) (continued)  
for: bpp120 in P -1

|     |     |      |      |           |
|-----|-----|------|------|-----------|
| C1  | -N1 | -N2  | -Fe1 | 178.6(4)  |
| N2  | -N1 | -C1  | -C2  | 0.1(6)    |
| C1  | -N1 | -N2  | -C3  | -0.3(6)   |
| Fe1 | -N2 | -C3  | -C2  | -178.8(3) |
| Fe1 | -N2 | -C3  | -C4  | -0.2(6)   |
| N1  | -N2 | -C3  | -C4  | 179.0(4)  |
| N1  | -N2 | -C3  | -C2  | 0.4(5)    |
| Fe1 | -N3 | -C4  | -C3  | 1.8(5)    |
| C8  | -N3 | -C4  | -C3  | -179.0(4) |
| C4  | -N3 | -C8  | -C7  | -1.2(7)   |
| Fe1 | -N3 | -C8  | -C9  | -1.8(5)   |
| C4  | -N3 | -C8  | -C9  | 179.0(4)  |
| C8  | -N3 | -C4  | -C5  | 1.3(7)    |
| Fe1 | -N3 | -C8  | -C7  | 178.0(4)  |
| Fe1 | -N3 | -C4  | -C5  | -177.9(4) |
| C9  | -N4 | -N5  | -C11 | -0.8(6)   |
| N5  | -N4 | -C9  | -C8  | 179.0(4)  |
| N5  | -N4 | -C9  | -C10 | 0.2(6)    |
| Fe1 | -N4 | -C9  | -C8  | -3.5(6)   |
| Fe1 | -N4 | -N5  | -C11 | -177.5(4) |
| Fe1 | -N4 | -C9  | -C10 | 177.7(4)  |
| N4  | -N5 | -C11 | -C10 | 1.1(6)    |
| C12 | -N6 | -N7  | -C14 | 0.1(6)    |
| C12 | -N6 | -N7  | -Fe1 | 173.6(4)  |
| N7  | -N6 | -C12 | -C13 | -0.1(6)   |
| N6  | -N7 | -C14 | -C13 | -0.2(6)   |
| Fe1 | -N7 | -C14 | -C13 | -175.4(4) |
| N6  | -N7 | -C14 | -C15 | 179.0(4)  |

Table S7 - Torsion Angles (Degrees) (continued)  
for: bpp120 in P -1

|     |      |      |      |           |
|-----|------|------|------|-----------|
| Fe1 | -N7  | -C14 | -C15 | 3.8(6)    |
| Fe1 | -N8  | -C15 | -C16 | -178.6(4) |
| C15 | -N8  | -C19 | -C20 | 179.2(4)  |
| C19 | -N8  | -C15 | -C16 | 0.4(8)    |
| Fe1 | -N8  | -C19 | -C20 | -1.9(6)   |
| Fe1 | -N8  | -C15 | -C14 | 2.2(6)    |
| C19 | -N8  | -C15 | -C14 | -178.9(4) |
| C15 | -N8  | -C19 | -C18 | 0.3(7)    |
| Fe1 | -N8  | -C19 | -C18 | 179.2(4)  |
| C20 | -N9  | -N10 | -C22 | 0.4(6)    |
| N10 | -N9  | -C20 | -C19 | -178.8(4) |
| Fe1 | -N9  | -C20 | -C19 | 0.4(6)    |
| Fe1 | -N9  | -C20 | -C21 | 178.8(4)  |
| N10 | -N9  | -C20 | -C21 | -0.4(6)   |
| Fe1 | -N9  | -N10 | -C22 | -178.6(4) |
| N9  | -N10 | -C22 | -C21 | -0.1(6)   |
| N1  | -C1  | -C2  | -C3  | 0.2(6)    |
| C1  | -C2  | -C3  | -N2  | -0.4(6)   |
| C1  | -C2  | -C3  | -C4  | -178.6(6) |
| C2  | -C3  | -C4  | -C5  | -3.1(9)   |
| N2  | -C3  | -C4  | -N3  | -1.0(6)   |
| N2  | -C3  | -C4  | -C5  | 178.8(5)  |
| C2  | -C3  | -C4  | -N3  | 177.2(5)  |
| C3  | -C4  | -C5  | -C6  | -179.9(5) |
| N3  | -C4  | -C5  | -C6  | -0.2(8)   |
| C4  | -C5  | -C6  | -C7  | -1.0(8)   |
| C5  | -C6  | -C7  | -C8  | 1.2(8)    |
| C6  | -C7  | -C8  | -C9  | 179.7(5)  |

Table S7 - Torsion Angles (Degrees) (continued)  
for: bpp120 in P -1

|     |      |      |      |           |
|-----|------|------|------|-----------|
| C6  | -C7  | -C8  | -N3  | -0.1(8)   |
| C7  | -C8  | -C9  | -N4  | -176.4(5) |
| C7  | -C8  | -C9  | -C10 | 2.0(10)   |
| N3  | -C8  | -C9  | -C10 | -178.2(6) |
| N3  | -C8  | -C9  | -N4  | 3.4(6)    |
| N4  | -C9  | -C10 | -C11 | 0.4(6)    |
| C8  | -C9  | -C10 | -C11 | -178.0(6) |
| C9  | -C10 | -C11 | -N5  | -0.9(6)   |
| N6  | -C12 | -C13 | -C14 | 0.0(6)    |
| C12 | -C13 | -C14 | -N7  | 0.1(6)    |
| C12 | -C13 | -C14 | -C15 | -178.9(6) |
| C13 | -C14 | -C15 | -C16 | -4.1(10)  |
| C13 | -C14 | -C15 | -N8  | 175.1(6)  |
| N7  | -C14 | -C15 | -C16 | 177.0(5)  |
| N7  | -C14 | -C15 | -N8  | -3.9(6)   |
| C14 | -C15 | -C16 | -C17 | 179.5(5)  |
| N8  | -C15 | -C16 | -C17 | 0.3(8)    |
| C15 | -C16 | -C17 | -C18 | -1.7(9)   |
| C16 | -C17 | -C18 | -C19 | 2.3(9)    |
| C17 | -C18 | -C19 | -C20 | 179.8(5)  |
| C17 | -C18 | -C19 | -N8  | -1.6(8)   |
| N8  | -C19 | -C20 | -C21 | -176.9(6) |
| C18 | -C19 | -C20 | -C21 | 1.9(10)   |
| N8  | -C19 | -C20 | -N9  | 0.9(6)    |
| C18 | -C19 | -C20 | -N9  | 179.7(5)  |
| C19 | -C20 | -C21 | -C22 | 178.3(6)  |
| N9  | -C20 | -C21 | -C22 | 0.4(6)    |
| C20 | -C21 | -C22 | -N10 | -0.2(6)   |

Table S8 - Contact Distances(Angstrom)  
for: bpp120 in P -1

|     |         |          |     |        |          |
|-----|---------|----------|-----|--------|----------|
| Se1 | .C18_l  | 3.677(6) | N4  | .N8    | 3.168(6) |
| Se1 | .N5_a   | 3.335(6) | N4  | .N9    | 2.974(6) |
| Se2 | .C5_k   | 3.588(6) | N5  | .Se1_c | 3.335(6) |
| Se2 | .N10_b  | 3.320(6) | N5  | .C23_c | 3.216(8) |
| Se1 | .H5N_a  | 2.4800   | N6  | .N12   | 2.794(8) |
| Se1 | .H16_m  | 3.1500   | N6  | .C22_b | 3.293(7) |
| Se1 | .H13_m  | 3.2700   | N7  | .N8    | 2.539(6) |
| Se1 | .H18_l  | 3.0800   | N7  | .N4    | 2.974(6) |
| Se2 | .H7_n   | 2.9500   | N7  | .N3    | 3.190(5) |
| Se2 | .H10N_b | 2.4500   | N7  | .N2    | 3.033(6) |
| Se2 | .H5_k   | 2.9800   | N7  | .C15   | 2.376(7) |
| N1  | .C11_a  | 3.368(7) | N8  | .N7    | 2.539(6) |
| N1  | .C22_b  | 3.377(7) | N8  | .N9    | 2.525(6) |
| N1  | .N11    | 2.784(8) | N8  | .N4    | 3.168(6) |
| N2  | .N7     | 3.033(6) | N8  | .C20   | 2.329(7) |
| N2  | .N3     | 2.529(6) | N8  | .N2    | 3.192(6) |
| N2  | .N8     | 3.192(6) | N8  | .C14   | 2.315(6) |
| N2  | .N9     | 2.972(6) | N9  | .N2    | 2.972(6) |
| N2  | .C4     | 2.368(7) | N9  | .N4    | 2.974(6) |
| N3  | .N7     | 3.190(5) | N9  | .N8    | 2.525(6) |
| N3  | .C9     | 2.331(6) | N9  | .N3    | 3.145(5) |
| N3  | .N2     | 2.529(6) | N9  | .C19   | 2.371(7) |
| N3  | .N4     | 2.533(6) | N10 | .Se2_f | 3.320(6) |
| N3  | .N9     | 3.145(5) | N10 | .C24_f | 3.245(8) |
| N3  | .C3     | 2.317(6) | N11 | .N1    | 2.784(8) |
| N4  | .N3     | 2.533(6) | N12 | .N6    | 2.794(8) |
| N4  | .C8     | 2.360(6) | N1  | .H22_b | 2.5200   |
| N4  | .N7     | 2.974(6) | N2  | .H22_b | 2.6500   |

Table S8 - Contact Distances(Angstrom) (continued)  
for: bpp120 in P -1

|     |        |          |     |        |          |
|-----|--------|----------|-----|--------|----------|
| N5  | .H12_d | 2.6500   | C19 | .C23   | 3.545(8) |
| N6  | .H1_e  | 2.6800   | C20 | .C12_d | 3.600(8) |
| N9  | .H11_a | 2.8400   | C21 | .C12_d | 3.465(8) |
| N10 | .H11_a | 2.6300   | C21 | .C13_d | 3.527(8) |
| N11 | .H1N   | 1.9100   | C22 | .C1_d  | 3.574(9) |
| N11 | .H17_m | 2.9400   | C22 | .N1_d  | 3.377(7) |
| N12 | .H6_n  | 2.7500   | C22 | .N6_d  | 3.293(7) |
| N12 | .H6N   | 1.9200   | C22 | .C11_a | 3.520(8) |
| C1  | .C9_a  | 3.483(8) | C23 | .C16_m | 3.461(9) |
| C1  | .C10_a | 3.392(8) | C23 | .C19   | 3.545(8) |
| C1  | .C11_a | 3.591(8) | C23 | .N5_a  | 3.216(8) |
| C1  | .C22_b | 3.574(9) | C23 | .C18   | 3.467(8) |
| C2  | .C10_a | 3.557(8) | C24 | .N10_b | 3.245(8) |
| C5  | .C24   | 3.538(8) | C24 | .C7_n  | 3.563(9) |
| C5  | .Se2_g | 3.588(6) | C24 | .C5    | 3.538(8) |
| C7  | .C24_h | 3.563(9) | C1  | .H22_b | 2.7000   |
| C9  | .C1_e  | 3.483(8) | C2  | .H22_b | 2.9400   |
| C10 | .C1_e  | 3.392(8) | C2  | .H5    | 3.0700   |
| C10 | .C2_e  | 3.557(8) | C3  | .H22_b | 2.8700   |
| C11 | .C22_e | 3.520(8) | C10 | .H7    | 3.0800   |
| C11 | .N1_e  | 3.368(7) | C13 | .H16   | 3.0600   |
| C11 | .C1_e  | 3.591(8) | C20 | .H11_a | 2.9100   |
| C12 | .C20_b | 3.600(8) | C21 | .H11_a | 2.8100   |
| C12 | .C21_b | 3.465(8) | C21 | .H18   | 3.0900   |
| C13 | .C21_b | 3.527(8) | C22 | .H11_a | 2.6200   |
| C16 | .C23_i | 3.461(9) | C23 | .H5N_a | 2.6100   |
| C18 | .Se1_j | 3.677(6) | C23 | .H1N   | 2.8000   |
| C18 | .C23   | 3.467(8) | C23 | .H16_m | 2.7000   |

Table S8 - Contact Distances(Angstrom) (continued)  
for: bpp120 in P -1

|     |         |        |      |        |        |
|-----|---------|--------|------|--------|--------|
| C24 | .H10N_b | 2.6300 | H10N | .Se2_f | 2.4500 |
| C24 | .H7_n   | 2.9200 | H10N | .C24_f | 2.6300 |
| C24 | .H6_n   | 3.0900 | H11  | .N9_e  | 2.8400 |
| C24 | .H6N    | 2.7700 | H11  | .N10_e | 2.6300 |
| H1  | .N6_a   | 2.6800 | H11  | .C20_e | 2.9100 |
| H1  | .H6N_a  | 2.3900 | H11  | .C21_e | 2.8100 |
| H1N | .C23    | 2.8000 | H11  | .C22_e | 2.6200 |
| H1N | .N11    | 1.9100 | H12  | .N5_b  | 2.6500 |
| H5  | .H5_k   | 2.5800 | H12  | .H5N_b | 2.4200 |
| H5  | .C2     | 3.0700 | H13  | .Se1_i | 3.2700 |
| H5  | .Se2_g  | 2.9800 | H16  | .C13   | 3.0600 |
| H5N | .Se1_c  | 2.4800 | H16  | .Se1_i | 3.1500 |
| H5N | .C23_c  | 2.6100 | H16  | .C23_i | 2.7000 |
| H5N | .H12_d  | 2.4200 | H17  | .N11_i | 2.9400 |
| H6  | .N12_h  | 2.7500 | H18  | .C21   | 3.0900 |
| H6  | .C24_h  | 3.0900 | H18  | .Se1_j | 3.0800 |
| H6N | .N12    | 1.9200 | H22  | .N1_d  | 2.5200 |
| H6N | .C24    | 2.7700 | H22  | .N2_d  | 2.6500 |
| H6N | .H1_e   | 2.3900 | H22  | .C1_d  | 2.7000 |
| H7  | .C10    | 3.0800 | H22  | .C2_d  | 2.9400 |
| H7  | .Se2_h  | 2.9500 | H22  | .C3_d  | 2.8700 |
| H7  | .C24_h  | 2.9200 |      |        |        |

Table S9 - Hydrogen Bonds (Angstrom, Deg)  
for: bpp120 in P -1

|     |    |      |    |     |        |        |          |        |       |
|-----|----|------|----|-----|--------|--------|----------|--------|-------|
| N1  | -- | H1N  | .. | N11 | 0.8800 | 1.9100 | 2.784(8) | 171.00 | .     |
| N5  | -- | H5N  | .. | Se1 | 0.8800 | 2.4800 | 3.335(6) | 166.00 | 1_545 |
| N6  | -- | H6N  | .. | N12 | 0.8800 | 1.9200 | 2.794(8) | 171.00 | .     |
| N10 | -- | H10N | .. | Se2 | 0.8800 | 2.4500 | 3.320(6) | 168.00 | 1_655 |
| C7  | -- | H7   | .. | Se2 | 0.9500 | 2.9500 | 3.845(6) | 158.00 | 2_655 |
| C22 | -- | H22  | .. | N1  | 0.9500 | 2.5200 | 3.377(7) | 151.00 | 1_655 |



# Translation of Symmetry Code to Equiv.Pos

a =[ 1565.00 ] = x,1+y,z  
b =[ 1455.00 ] = -1+x,y,z  
c =[ 1545.00 ] = x,-1+y,z  
d =[ 1655.00 ] = 1+x,y,z  
g =[ 2665.00 ] = 1-x,1-y,-z  
h =[ 2655.00 ] = 1-x,-y,-z  
i =[ 2666.00 ] = 1-x,1-y,1-z  
j =[ 2766.00 ] = 2-x,1-y,1-z  
k =[ 2665.00 ] = 1-x,1-y,-z  
l =[ 2766.00 ] = 2-x,1-y,1-z  
m =[ 2666.00 ] = 1-x,1-y,1-z

=====  
S U P P L E M E N T A R Y   M A T E R I A L  
=====  
B E L O N G I N G   T O   T H E   P A P E R

b y

C o n t e n t s  
=====

- Table S1 - Crystal Data and Details of the Structure Determination  
for: bpp in P -1
- Table S2 - Final Coordinates and Equivalent Isotropic Displacement  
Parameters of the non-Hydrogen atoms  
for: bpp in P -1
- Table S3 - Hydrogen Atom Positions and Isotropic Displacement  
Parameters  
for: bpp in P -1
- Table S4 - (An)isotropic Displacement Parameters  
for: bpp in P -1
- Table S5 - Bond Distances (Angstrom)  
for: bpp in P -1
- Table S6 - Bond Angles (Degrees)  
for: bpp in P -1
- Table S7 - Torsion Angles (Degrees)  
for: bpp in P -1
- Table S8 - Contact Distances (Angstrom)  
for: bpp in P -1
- Table S9 - Hydrogen Bonds (Angstrom, Deg)  
for: bpp in P -1

Table S1 - Crystal Data and Details of the Structure Determination  
for: bpp in P -1

| Crystal Data                        |                             |               |           |
|-------------------------------------|-----------------------------|---------------|-----------|
| Formula                             |                             |               | ?         |
| Formula Weight                      |                             |               | 692.48    |
| Crystal System                      |                             |               | Triclinic |
| Space group                         | P-1                         |               | (No. 2)   |
| a, b, c [Angstrom]                  | 8.368(1)                    | 8.426(2)      | 19.889(5) |
| alpha, beta, gamma [deg]            | 87.024(8)                   | 83.163(6)     | 88.898(9) |
| V [Ang**3]                          |                             |               | 1390.4(5) |
| Z                                   |                             |               | 2         |
| D(calc) [g/cm**3]                   |                             |               | 1.654     |
| Mu(MoKa) [ /mm ]                    |                             |               | 3.348     |
| F(000)                              |                             |               | 684       |
| Crystal Size [mm]                   |                             | 0.00 x 0.00 x | 0.00      |
| Data Collection                     |                             |               |           |
| Temperature (K)                     |                             |               | *****     |
| Radiation [Angstrom]                | MoKa                        |               | 0.71073   |
| Theta Min-Max [Deg]                 |                             | 0.0,          | 0.0       |
| Dataset                             | 999:-99 ; 999:-99 ; 999:-99 |               |           |
| Tot., Uniq. Data, R(int)            | 0,                          | 0,            | 0.000     |
| Observed data [I > 0.0 sigma(I)]    |                             |               | 0         |
| Refinement                          |                             |               |           |
| Nref, Npar                          |                             | 0,            | 0         |
| R, wR2, S                           | 0.0000,                     | 0.0000,       | 0.00      |
| w =                                 |                             |               |           |
| Max. and Av. Shift/Error            |                             | 0.00,         | 0.00      |
| Min. and Max. Resd. Dens. [e/Ang^3] |                             | 0.00,         | 0.00      |

Table S2 - Final Coordinates and Equivalent Isotropic Displacement Parameters of the non-Hydrogen atoms for: bpp in P -1

| Atom | x          | y          | z           | U(eq) [Ang <sup>2</sup> ] |
|------|------------|------------|-------------|---------------------------|
| ---- | ---        | ---        | ---         | -----                     |
| *Fe1 | 0.73503(8) | 0.22740(8) | 0.24897(3)  | 0.0450(3)                 |
| *Zn1 | 0.73503(8) | 0.22740(8) | 0.24897(3)  | 0.0450(3)                 |
| N1   | 0.5834(5)  | 0.5967(5)  | 0.2367(2)   | 0.0541(17)                |
| N2   | 0.6377(5)  | 0.4564(5)  | 0.2125(2)   | 0.0433(16)                |
| N3   | 0.7365(5)  | 0.2126(5)  | 0.14346(19) | 0.0432(16)                |
| N4   | 0.8402(5)  | -0.0061(5) | 0.2248(2)   | 0.0504(17)                |
| N5   | 0.9067(6)  | -0.1310(6) | 0.2563(3)   | 0.0650(17)                |
| N6   | 0.3756(6)  | 0.0602(5)  | 0.2736(2)   | 0.0608(17)                |
| N7   | 0.5027(5)  | 0.1325(5)  | 0.2933(2)   | 0.0483(17)                |
| N8   | 0.7273(5)  | 0.2512(5)  | 0.35451(19) | 0.0446(16)                |
| N9   | 0.9661(5)  | 0.3264(5)  | 0.2647(2)   | 0.0504(17)                |
| N10  | 1.1054(6)  | 0.3690(5)  | 0.2278(3)   | 0.0586(17)                |
| C1   | 0.5376(7)  | 0.6935(7)  | 0.1865(3)   | 0.068(3)                  |
| C2   | 0.5614(7)  | 0.6168(7)  | 0.1279(3)   | 0.063(2)                  |
| C3   | 0.6239(6)  | 0.4696(6)  | 0.1458(3)   | 0.0458(17)                |
| C4   | 0.6776(6)  | 0.3319(6)  | 0.1067(3)   | 0.0473(19)                |
| C5   | 0.6695(7)  | 0.3233(7)  | 0.0377(3)   | 0.061(2)                  |
| C6   | 0.7232(8)  | 0.1857(8)  | 0.0074(3)   | 0.072(3)                  |
| C7   | 0.7850(7)  | 0.0635(7)  | 0.0445(3)   | 0.063(2)                  |
| C8   | 0.7915(6)  | 0.0795(6)  | 0.1130(3)   | 0.0498(19)                |
| C9   | 0.8540(6)  | -0.0383(6) | 0.1590(3)   | 0.0482(19)                |
| C10  | 0.9299(7)  | -0.1858(7) | 0.1491(3)   | 0.069(3)                  |
| C11  | 0.9588(8)  | -0.2403(8) | 0.2121(4)   | 0.081(3)                  |
| C12  | 0.2704(8)  | 0.0178(7)  | 0.3269(3)   | 0.074(3)                  |
| C13  | 0.3268(7)  | 0.0623(7)  | 0.3839(3)   | 0.069(3)                  |
| C14  | 0.4733(7)  | 0.1327(7)  | 0.3607(3)   | 0.054(2)                  |

Table S2 - Final Coordinates and Equivalent Isotropic Displacement  
Parameters of the non-Hydrogen atoms (continued)  
for: bpp in P -1

| Atom<br>---- | x<br>---    | y<br>---    | z<br>---   | U(eq) [Ang <sup>2</sup> ]<br>----- |
|--------------|-------------|-------------|------------|------------------------------------|
| C15          | 0.5948(7)   | 0.2056(6)   | 0.3952(3)  | 0.053(2)                           |
| C16          | 0.5840(8)   | 0.2247(8)   | 0.4650(3)  | 0.075(3)                           |
| C17          | 0.7100(10)  | 0.2934(8)   | 0.4906(3)  | 0.086(3)                           |
| C18          | 0.8453(8)   | 0.3373(8)   | 0.4486(3)  | 0.072(3)                           |
| C19          | 0.8501(7)   | 0.3156(6)   | 0.3796(3)  | 0.052(2)                           |
| C20          | 0.9837(7)   | 0.3569(6)   | 0.3287(3)  | 0.051(2)                           |
| C21          | 1.1361(7)   | 0.4183(7)   | 0.3321(4)  | 0.071(3)                           |
| C22          | 1.2079(7)   | 0.4251(7)   | 0.2670(4)  | 0.076(3)                           |
| Se1          | 0.86985(10) | 0.81452(10) | 0.42767(4) | 0.0928(3)                          |
| N11          | 0.6039(8)   | 0.6627(8)   | 0.3715(3)  | 0.097(3)                           |
| C23          | 0.7079(9)   | 0.7194(9)   | 0.3947(3)  | 0.076(3)                           |
| Se2          | 0.18568(9)  | 0.31273(9)  | 0.06115(3) | 0.0846(3)                          |
| N12          | 0.3426(7)   | 0.0514(7)   | 0.1346(3)  | 0.089(3)                           |
| C24          | 0.2831(8)   | 0.1519(8)   | 0.1051(3)  | 0.066(3)                           |

U(eq) = 1/3 of the trace of the orthogonalized U Tensor

Starred Atom sites have a S.O.F less than 1.0

Table S3 - Hydrogen Atom Positions and Isotropic Displacement  
Parameters  
for: bpp in P -1

| Atom | x       | y        | z        | U(iso) [Ang <sup>2</sup> ] |
|------|---------|----------|----------|----------------------------|
| H1   | 0.49641 | 0.79615  | 0.19124  | 0.0816                     |
| H1N  | 0.57879 | 0.62068  | 0.27835  | 0.0648                     |
| H2   | 0.54039 | 0.65473  | 0.08509  | 0.0749                     |
| H5   | 0.62899 | 0.40792  | 0.01265  | 0.0734                     |
| H5N  | 0.91462 | -0.13948 | 0.29908  | 0.0777                     |
| H6   | 0.71732 | 0.17594  | -0.03856 | 0.0869                     |
| H6N  | 0.36378 | 0.04340  | 0.23216  | 0.0727                     |
| H7   | 0.82212 | -0.02912 | 0.02398  | 0.0756                     |
| H10  | 0.95513 | -0.23559 | 0.10851  | 0.0827                     |
| H10N | 1.12570 | 0.36110  | 0.18467  | 0.0705                     |
| H11  | 1.00670 | -0.33742 | 0.22270  | 0.0972                     |
| H12  | 0.17388 | -0.03387 | 0.32512  | 0.0892                     |
| H13  | 0.27869 | 0.04893  | 0.42843  | 0.0828                     |
| H16  | 0.49336 | 0.19158  | 0.49351  | 0.0900                     |
| H17  | 0.70330 | 0.31020  | 0.53672  | 0.1030                     |
| H18  | 0.93220 | 0.38075  | 0.46586  | 0.0865                     |
| H21  | 1.17913 | 0.44811  | 0.37054  | 0.0849                     |
| H22  | 1.31067 | 0.46234  | 0.25229  | 0.0906                     |

=====  
The Temperature Factor has the Form of  $\text{Exp}(-T)$  Where  
 $T = 8 * (\text{Pi} ** 2) * U * (\text{Sin}(\text{Theta}) / \text{Lambda}) ** 2$  for Isotropic Atoms

Table S4 - (An)isotropic Displacement Parameters  
for: bpp in P -1

| Atom | U(1,1) or U | U(2,2)    | U(3,3)    | U(2,3)      | U(1,3)      | U(1,2)    |
|------|-------------|-----------|-----------|-------------|-------------|-----------|
| ---- | -----       | -----     | -----     | -----       | -----       | -----     |
| Fe1  | 0.0461(5)   | 0.0477(5) | 0.0417(4) | -0.0045(3)  | -0.0069(3)  | 0.0023(3) |
| Zn1  | 0.0461(5)   | 0.0477(5) | 0.0417(4) | -0.0045(3)  | -0.0069(3)  | 0.0023(3) |
| N1   | 0.046(3)    | 0.053(3)  | 0.065(3)  | -0.013(2)   | -0.009(2)   | -0.002(2) |
| N2   | 0.043(3)    | 0.038(3)  | 0.050(2)  | -0.0067(19) | -0.0083(19) | 0.002(2)  |
| N3   | 0.046(3)    | 0.037(3)  | 0.047(2)  | -0.004(2)   | -0.0074(19) | 0.003(2)  |
| N4   | 0.052(3)    | 0.043(3)  | 0.056(3)  | 0.002(2)    | -0.008(2)   | 0.001(2)  |
| N5   | 0.062(3)    | 0.053(3)  | 0.081(3)  | 0.011(3)    | -0.019(3)   | -0.003(3) |
| N6   | 0.059(3)    | 0.053(3)  | 0.072(3)  | -0.008(3)   | -0.012(3)   | -0.002(3) |
| N7   | 0.039(3)    | 0.049(3)  | 0.059(3)  | -0.007(2)   | -0.012(2)   | -0.002(2) |
| N8   | 0.042(3)    | 0.050(3)  | 0.043(2)  | -0.004(2)   | -0.010(2)   | 0.001(2)  |
| N9   | 0.041(3)    | 0.043(3)  | 0.066(3)  | -0.006(2)   | -0.001(2)   | 0.003(2)  |
| N10  | 0.049(3)    | 0.046(3)  | 0.078(3)  | -0.003(2)   | 0.003(3)    | 0.006(2)  |
| C1   | 0.064(4)    | 0.043(4)  | 0.098(5)  | 0.003(4)    | -0.019(4)   | 0.010(3)  |
| C2   | 0.068(4)    | 0.054(4)  | 0.068(4)  | 0.002(3)    | -0.022(3)   | 0.005(3)  |
| C3   | 0.045(3)    | 0.038(3)  | 0.056(3)  | 0.001(2)    | -0.014(2)   | 0.002(3)  |
| C4   | 0.047(3)    | 0.046(4)  | 0.050(3)  | -0.003(3)   | -0.010(2)   | -0.003(3) |
| C5   | 0.074(4)    | 0.060(4)  | 0.051(3)  | 0.001(3)    | -0.018(3)   | 0.002(3)  |
| C6   | 0.088(5)    | 0.087(5)  | 0.043(3)  | -0.011(3)   | -0.009(3)   | 0.000(4)  |
| C7   | 0.071(4)    | 0.063(4)  | 0.057(3)  | -0.020(3)   | -0.008(3)   | 0.008(3)  |
| C8   | 0.048(3)    | 0.050(4)  | 0.051(3)  | -0.007(3)   | -0.002(2)   | -0.003(3) |
| C9   | 0.042(3)    | 0.042(4)  | 0.061(3)  | -0.007(3)   | -0.006(2)   | 0.000(3)  |
| C10  | 0.067(4)    | 0.049(4)  | 0.090(5)  | -0.016(3)   | -0.003(4)   | 0.014(3)  |
| C11  | 0.081(5)    | 0.043(4)  | 0.118(6)  | 0.001(4)    | -0.012(4)   | 0.013(4)  |
| C12  | 0.059(4)    | 0.072(5)  | 0.091(5)  | 0.003(4)    | -0.007(4)   | -0.018(4) |
| C13  | 0.054(4)    | 0.079(5)  | 0.070(4)  | 0.009(3)    | 0.007(3)    | -0.015(3) |
| C14  | 0.053(4)    | 0.052(4)  | 0.056(3)  | -0.002(3)   | -0.005(3)   | 0.006(3)  |

Table S4 - (An)isotropic Displacement Parameters (continued)  
for: bpp in P -1

| Atom | U(1,1) or U | U(2,2)    | U(3,3)    | U(2,3)     | U(1,3)     | U(1,2)     |
|------|-------------|-----------|-----------|------------|------------|------------|
| C15  | 0.058(4)    | 0.055(4)  | 0.045(3)  | -0.004(3)  | -0.002(3)  | 0.005(3)   |
| C16  | 0.091(5)    | 0.084(5)  | 0.046(3)  | -0.001(3)  | 0.007(3)   | -0.002(4)  |
| C17  | 0.125(7)    | 0.091(6)  | 0.044(3)  | -0.008(3)  | -0.018(4)  | -0.013(5)  |
| C18  | 0.084(5)    | 0.079(5)  | 0.057(4)  | -0.009(3)  | -0.022(4)  | -0.006(4)  |
| C19  | 0.056(4)    | 0.051(4)  | 0.050(3)  | -0.004(3)  | -0.013(3)  | 0.007(3)   |
| C20  | 0.047(4)    | 0.038(3)  | 0.070(4)  | -0.010(3)  | -0.020(3)  | 0.007(3)   |
| C21  | 0.053(4)    | 0.067(5)  | 0.098(5)  | -0.015(4)  | -0.028(4)  | -0.003(3)  |
| C22  | 0.035(4)    | 0.062(5)  | 0.131(6)  | -0.006(4)  | -0.012(4)  | 0.000(3)   |
| Se1  | 0.0965(6)   | 0.1102(7) | 0.0742(5) | -0.0107(4) | -0.0187(4) | 0.0002(5)  |
| N11  | 0.100(5)    | 0.125(6)  | 0.069(4)  | -0.023(4)  | -0.012(3)  | 0.003(4)   |
| C23  | 0.090(6)    | 0.087(5)  | 0.049(4)  | -0.007(3)  | -0.002(3)  | 0.024(4)   |
| Se2  | 0.0999(6)   | 0.0811(5) | 0.0724(4) | -0.0012(4) | -0.0096(4) | -0.0030(4) |
| N12  | 0.109(5)    | 0.080(4)  | 0.080(4)  | -0.013(3)  | -0.021(3)  | 0.010(4)   |
| C24  | 0.077(5)    | 0.066(5)  | 0.056(4)  | -0.015(3)  | -0.008(3)  | -0.009(4)  |

=====

The Temperature Factor has the Form of  $\text{Exp}(-T)$  Where  
 $T = 8 \cdot (\text{Pi}^2) \cdot U \cdot (\text{Sin}(\text{Theta}) / \text{Lambda})^2$  for Isotropic Atoms  
 $T = 2 \cdot (\text{Pi}^2) \cdot \text{Sum}_{ij} (h(i) \cdot h(j) \cdot U(i,j) \cdot \text{Astar}(i) \cdot \text{Astar}(j))$ , for  
Anisotropic Atoms.  $\text{Astar}(i)$  are Reciprocal Axial Lengths and  
 $h(i)$  are the Reflection Indices.



Table S5 - Bond Distances (Angstrom)  
for: bpp in P -1

|     |      |          |     |       |           |
|-----|------|----------|-----|-------|-----------|
| Se1 | -C23 | 1.794(7) | N9  | -N10  | 1.346(7)  |
| Se2 | -C24 | 1.808(7) | N10 | -C22  | 1.334(8)  |
| Zn1 | -N4  | 2.193(4) | N1  | -H1N  | 0.8600    |
| Zn1 | -N3  | 2.107(4) | N5  | -H5N  | 0.8600    |
| Zn1 | -N9  | 2.183(4) | N6  | -H6N  | 0.8600    |
| Zn1 | -N7  | 2.185(4) | N10 | -H10N | 0.8600    |
| Zn1 | -N2  | 2.202(4) | N11 | -C23  | 1.155(10) |
| Zn1 | -N8  | 2.112(4) | N12 | -C24  | 1.145(9)  |
| Fe1 | -N3  | 2.107(4) | C1  | -C2   | 1.354(8)  |
| Fe1 | -N4  | 2.193(4) | C2  | -C3   | 1.383(8)  |
| Fe1 | -N2  | 2.202(4) | C3  | -C4   | 1.464(8)  |
| Fe1 | -N8  | 2.112(4) | C4  | -C5   | 1.388(8)  |
| Fe1 | -N9  | 2.183(4) | C5  | -C6   | 1.378(9)  |
| Fe1 | -N7  | 2.185(4) | C6  | -C7   | 1.365(9)  |
| N1  | -C1  | 1.343(7) | C7  | -C8   | 1.384(8)  |
| N1  | -N2  | 1.350(6) | C8  | -C9   | 1.448(8)  |
| N2  | -C3  | 1.344(7) | C9  | -C10  | 1.397(8)  |
| N3  | -C8  | 1.349(7) | C10 | -C11  | 1.359(10) |
| N3  | -C4  | 1.334(7) | C12 | -C13  | 1.352(8)  |
| N4  | -C9  | 1.341(7) | C13 | -C14  | 1.390(8)  |
| N4  | -N5  | 1.342(7) | C14 | -C15  | 1.455(8)  |
| N5  | -C11 | 1.337(9) | C15 | -C16  | 1.398(8)  |
| N6  | -C12 | 1.333(8) | C16 | -C17  | 1.374(10) |
| N6  | -N7  | 1.343(6) | C17 | -C18  | 1.369(10) |
| N7  | -C14 | 1.334(7) | C18 | -C19  | 1.390(8)  |
| N8  | -C19 | 1.331(7) | C19 | -C20  | 1.451(8)  |
| N8  | -C15 | 1.343(7) | C20 | -C21  | 1.396(8)  |
| N9  | -C20 | 1.337(7) | C21 | -C22  | 1.360(11) |

Table S5 - Bond Distances (Angstrom) (continued)  
for: bpp in P -1

|     |      |        |     |      |        |
|-----|------|--------|-----|------|--------|
| C1  | -H1  | 0.9300 | C12 | -H12 | 0.9300 |
| C2  | -H2  | 0.9300 | C13 | -H13 | 0.9300 |
| C5  | -H5  | 0.9300 | C16 | -H16 | 0.9300 |
| C6  | -H6  | 0.9300 | C17 | -H17 | 0.9300 |
| C7  | -H7  | 0.9300 | C18 | -H18 | 0.9300 |
| C10 | -H10 | 0.9300 | C21 | -H21 | 0.9300 |
| C11 | -H11 | 0.9300 | C22 | -H22 | 0.9300 |

Table S6 - Bond Angles (Degrees)  
for: bpp in P -1

|    |      |     |            |     |      |      |            |
|----|------|-----|------------|-----|------|------|------------|
| N2 | -Zn1 | -N3 | 74.10(16)  | N7  | -Fe1 | -N9  | 148.23(15) |
| N2 | -Zn1 | -N4 | 148.24(15) | N8  | -Fe1 | -N9  | 73.88(16)  |
| N2 | -Zn1 | -N7 | 95.46(16)  | N2  | -N1  | -C1  | 110.4(4)   |
| N2 | -Zn1 | -N8 | 103.48(16) | Fe1 | -N2  | -N1  | 139.6(3)   |
| N2 | -Zn1 | -N9 | 93.95(16)  | Fe1 | -N2  | -C3  | 115.3(3)   |
| N3 | -Zn1 | -N4 | 74.18(16)  | Zn1 | -N2  | -N1  | 139.6(3)   |
| N3 | -Zn1 | -N7 | 105.13(16) | Zn1 | -N2  | -C3  | 115.3(3)   |
| N3 | -Zn1 | -N8 | 177.52(17) | N1  | -N2  | -C3  | 105.1(4)   |
| N3 | -Zn1 | -N9 | 106.63(16) | Fe1 | -N3  | -C4  | 120.4(3)   |
| N4 | -Zn1 | -N7 | 94.41(16)  | Fe1 | -N3  | -C8  | 120.1(3)   |
| N4 | -Zn1 | -N8 | 108.25(16) | Zn1 | -N3  | -C4  | 120.4(3)   |
| N4 | -Zn1 | -N9 | 93.35(16)  | Zn1 | -N3  | -C8  | 120.1(3)   |
| N7 | -Zn1 | -N8 | 74.43(16)  | C4  | -N3  | -C8  | 119.5(4)   |
| N7 | -Zn1 | -N9 | 148.23(15) | Fe1 | -N4  | -N5  | 138.9(4)   |
| N8 | -Zn1 | -N9 | 73.88(16)  | Fe1 | -N4  | -C9  | 115.2(3)   |
| N2 | -Fe1 | -N3 | 74.10(16)  | Zn1 | -N4  | -N5  | 138.9(4)   |
| N2 | -Fe1 | -N4 | 148.24(15) | Zn1 | -N4  | -C9  | 115.2(3)   |
| N2 | -Fe1 | -N7 | 95.46(16)  | N5  | -N4  | -C9  | 105.8(4)   |
| N2 | -Fe1 | -N8 | 103.48(16) | N4  | -N5  | -C11 | 110.7(5)   |
| N2 | -Fe1 | -N9 | 93.95(16)  | N7  | -N6  | -C12 | 110.8(4)   |
| N3 | -Fe1 | -N4 | 74.18(16)  | Fe1 | -N7  | -N6  | 139.0(3)   |
| N3 | -Fe1 | -N7 | 105.13(16) | Fe1 | -N7  | -C14 | 115.9(4)   |
| N3 | -Fe1 | -N8 | 177.52(17) | Zn1 | -N7  | -N6  | 139.0(3)   |
| N3 | -Fe1 | -N9 | 106.63(16) | Zn1 | -N7  | -C14 | 115.9(4)   |
| N4 | -Fe1 | -N7 | 94.41(16)  | N6  | -N7  | -C14 | 105.0(4)   |
| N4 | -Fe1 | -N8 | 108.25(16) | Fe1 | -N8  | -C15 | 119.0(4)   |
| N4 | -Fe1 | -N9 | 93.35(16)  | Fe1 | -N8  | -C19 | 120.1(4)   |
| N7 | -Fe1 | -N8 | 74.43(16)  | Zn1 | -N8  | -C15 | 119.0(4)   |

Table S6 - Bond Angles (Degrees) (continued)  
for: bpp in P -1

|     |      |       |          |     |      |      |          |
|-----|------|-------|----------|-----|------|------|----------|
| Zn1 | -N8  | -C19  | 120.1(4) | N3  | -C8  | -C7  | 121.1(5) |
| C15 | -N8  | -C19  | 120.9(5) | N3  | -C8  | -C9  | 113.2(5) |
| Fe1 | -N9  | -N10  | 138.6(4) | N4  | -C9  | -C10 | 110.2(5) |
| Fe1 | -N9  | -C20  | 115.7(3) | C8  | -C9  | -C10 | 132.6(5) |
| Zn1 | -N9  | -N10  | 138.6(4) | N4  | -C9  | -C8  | 117.2(5) |
| Zn1 | -N9  | -C20  | 115.7(3) | C9  | -C10 | -C11 | 104.6(5) |
| N10 | -N9  | -C20  | 105.7(4) | N5  | -C11 | -C10 | 108.6(6) |
| N9  | -N10 | -C22  | 111.0(5) | N6  | -C12 | -C13 | 108.9(6) |
| N2  | -N1  | -H1N  | 125.00   | C12 | -C13 | -C14 | 104.1(5) |
| C1  | -N1  | -H1N  | 125.00   | N7  | -C14 | -C13 | 111.2(5) |
| N4  | -N5  | -H5N  | 125.00   | N7  | -C14 | -C15 | 116.1(5) |
| C11 | -N5  | -H5N  | 125.00   | C13 | -C14 | -C15 | 132.7(6) |
| N7  | -N6  | -H6N  | 125.00   | N8  | -C15 | -C14 | 114.5(5) |
| C12 | -N6  | -H6N  | 125.00   | N8  | -C15 | -C16 | 120.3(5) |
| N9  | -N10 | -H10N | 125.00   | C14 | -C15 | -C16 | 125.2(6) |
| C22 | -N10 | -H10N | 124.00   | C15 | -C16 | -C17 | 118.7(6) |
| N1  | -C1  | -C2   | 108.7(5) | C16 | -C17 | -C18 | 120.4(6) |
| C1  | -C2  | -C3   | 104.8(5) | C17 | -C18 | -C19 | 118.7(6) |
| N2  | -C3  | -C2   | 111.0(5) | N8  | -C19 | -C20 | 113.6(5) |
| N2  | -C3  | -C4   | 116.2(5) | C18 | -C19 | -C20 | 125.3(5) |
| C2  | -C3  | -C4   | 132.8(5) | N8  | -C19 | -C18 | 121.1(5) |
| N3  | -C4  | -C3   | 113.9(5) | N9  | -C20 | -C19 | 116.5(5) |
| N3  | -C4  | -C5   | 122.0(5) | N9  | -C20 | -C21 | 110.2(5) |
| C3  | -C4  | -C5   | 124.1(5) | C19 | -C20 | -C21 | 133.2(6) |
| C4  | -C5  | -C6   | 118.0(5) | C20 | -C21 | -C22 | 104.9(6) |
| C5  | -C6  | -C7   | 120.4(6) | N10 | -C22 | -C21 | 108.2(6) |
| C6  | -C7  | -C8   | 119.0(5) | N1  | -C1  | -H1  | 126.00   |
| C7  | -C8  | -C9   | 125.7(5) | C2  | -C1  | -H1  | 126.00   |

Table S6 - Bond Angles (Degrees) (continued)  
for: bpp in P -1

|     |      |      |        |     |      |      |          |
|-----|------|------|--------|-----|------|------|----------|
| C1  | -C2  | -H2  | 128.00 | C12 | -C13 | -H13 | 128.00   |
| C3  | -C2  | -H2  | 128.00 | C14 | -C13 | -H13 | 128.00   |
| C4  | -C5  | -H5  | 121.00 | C15 | -C16 | -H16 | 121.00   |
| C6  | -C5  | -H5  | 121.00 | C17 | -C16 | -H16 | 121.00   |
| C5  | -C6  | -H6  | 120.00 | C16 | -C17 | -H17 | 120.00   |
| C7  | -C6  | -H6  | 120.00 | C18 | -C17 | -H17 | 120.00   |
| C6  | -C7  | -H7  | 120.00 | C17 | -C18 | -H18 | 121.00   |
| C8  | -C7  | -H7  | 121.00 | C19 | -C18 | -H18 | 121.00   |
| C9  | -C10 | -H10 | 128.00 | C20 | -C21 | -H21 | 128.00   |
| C11 | -C10 | -H10 | 128.00 | C22 | -C21 | -H21 | 128.00   |
| N5  | -C11 | -H11 | 126.00 | N10 | -C22 | -H22 | 126.00   |
| C10 | -C11 | -H11 | 126.00 | C21 | -C22 | -H22 | 126.00   |
| N6  | -C12 | -H12 | 126.00 | Se1 | -C23 | -N11 | 177.4(6) |
| C13 | -C12 | -H12 | 126.00 | Se2 | -C24 | -N12 | 178.1(6) |

Table S7 - Torsion Angles (Degrees)  
for: bpp in P -1

|    |      |     |     |           |
|----|------|-----|-----|-----------|
| N3 | -Fe1 | -N2 | -N1 | -178.4(5) |
| N3 | -Fe1 | -N2 | -C3 | 1.9(3)    |
| N4 | -Fe1 | -N2 | -N1 | -175.1(4) |
| N4 | -Fe1 | -N2 | -C3 | 5.2(5)    |
| N7 | -Fe1 | -N2 | -N1 | 77.4(5)   |
| N7 | -Fe1 | -N2 | -C3 | -102.3(4) |
| N8 | -Fe1 | -N2 | -N1 | 2.2(5)    |
| N8 | -Fe1 | -N2 | -C3 | -177.5(3) |
| N9 | -Fe1 | -N2 | -N1 | -72.2(5)  |
| N9 | -Fe1 | -N2 | -C3 | 108.1(4)  |
| N2 | -Fe1 | -N3 | -C4 | -2.8(4)   |
| N2 | -Fe1 | -N3 | -C8 | 179.7(4)  |
| N4 | -Fe1 | -N3 | -C4 | 179.0(4)  |
| N4 | -Fe1 | -N3 | -C8 | 1.5(4)    |
| N7 | -Fe1 | -N3 | -C4 | 88.6(4)   |
| N7 | -Fe1 | -N3 | -C8 | -88.8(4)  |
| N9 | -Fe1 | -N3 | -C4 | -92.2(4)  |
| N9 | -Fe1 | -N3 | -C8 | 90.3(4)   |
| N2 | -Fe1 | -N4 | -N5 | 172.7(5)  |
| N2 | -Fe1 | -N4 | -C9 | -2.5(5)   |
| N3 | -Fe1 | -N4 | -N5 | 176.0(6)  |
| N3 | -Fe1 | -N4 | -C9 | 0.9(3)    |
| N7 | -Fe1 | -N4 | -N5 | -79.5(5)  |
| N7 | -Fe1 | -N4 | -C9 | 105.4(4)  |
| N8 | -Fe1 | -N4 | -N5 | -4.4(6)   |
| N8 | -Fe1 | -N4 | -C9 | -179.6(3) |
| N9 | -Fe1 | -N4 | -N5 | 69.7(5)   |
| N9 | -Fe1 | -N4 | -C9 | -105.5(4) |

Table S7 - Torsion Angles (Degrees) (continued)  
for: bpp in P -1

|    |      |     |      |           |
|----|------|-----|------|-----------|
| N2 | -Fe1 | -N7 | -N6  | 81.9(5)   |
| N2 | -Fe1 | -N7 | -C14 | -103.9(4) |
| N3 | -Fe1 | -N7 | -N6  | 7.0(5)    |
| N3 | -Fe1 | -N7 | -C14 | -178.8(4) |
| N4 | -Fe1 | -N7 | -N6  | -67.8(5)  |
| N4 | -Fe1 | -N7 | -C14 | 106.4(4)  |
| N8 | -Fe1 | -N7 | -N6  | -175.6(5) |
| N8 | -Fe1 | -N7 | -C14 | -1.4(4)   |
| N9 | -Fe1 | -N7 | -N6  | -171.5(4) |
| N9 | -Fe1 | -N7 | -C14 | 2.7(6)    |
| N2 | -Fe1 | -N8 | -C15 | 90.3(4)   |
| N2 | -Fe1 | -N8 | -C19 | -87.4(4)  |
| N4 | -Fe1 | -N8 | -C15 | -91.2(4)  |
| N4 | -Fe1 | -N8 | -C19 | 91.1(4)   |
| N7 | -Fe1 | -N8 | -C15 | -1.7(4)   |
| N7 | -Fe1 | -N8 | -C19 | -179.4(4) |
| N9 | -Fe1 | -N8 | -C15 | -179.4(4) |
| N9 | -Fe1 | -N8 | -C19 | 2.9(4)    |
| N2 | -Fe1 | -N9 | -N10 | -79.7(5)  |
| N2 | -Fe1 | -N9 | -C20 | 100.4(4)  |
| N3 | -Fe1 | -N9 | -N10 | -5.1(5)   |
| N3 | -Fe1 | -N9 | -C20 | 175.0(4)  |
| N4 | -Fe1 | -N9 | -N10 | 69.4(5)   |
| N4 | -Fe1 | -N9 | -C20 | -110.6(4) |
| N7 | -Fe1 | -N9 | -N10 | 173.3(4)  |
| N7 | -Fe1 | -N9 | -C20 | -6.6(5)   |
| N8 | -Fe1 | -N9 | -N10 | 177.4(5)  |
| N8 | -Fe1 | -N9 | -C20 | -2.5(4)   |

Table S7 - Torsion Angles (Degrees) (continued)  
for: bpp in P -1

|     |     |      |      |           |
|-----|-----|------|------|-----------|
| C1  | -N1 | -N2  | -Fe1 | -179.8(4) |
| C1  | -N1 | -N2  | -C3  | 0.0(6)    |
| N2  | -N1 | -C1  | -C2  | 0.1(6)    |
| Fe1 | -N2 | -C3  | -C2  | 179.8(4)  |
| Fe1 | -N2 | -C3  | -C4  | -1.0(6)   |
| N1  | -N2 | -C3  | -C2  | 0.0(6)    |
| N1  | -N2 | -C3  | -C4  | 179.2(4)  |
| Fe1 | -N3 | -C4  | -C3  | 3.2(6)    |
| Fe1 | -N3 | -C4  | -C5  | -176.9(4) |
| C8  | -N3 | -C4  | -C3  | -179.3(4) |
| C8  | -N3 | -C4  | -C5  | 0.6(8)    |
| Fe1 | -N3 | -C8  | -C7  | 176.2(4)  |
| Fe1 | -N3 | -C8  | -C9  | -3.5(6)   |
| C4  | -N3 | -C8  | -C7  | -1.2(8)   |
| C4  | -N3 | -C8  | -C9  | 179.1(4)  |
| Fe1 | -N4 | -N5  | -C11 | -176.4(4) |
| C9  | -N4 | -N5  | -C11 | -1.0(6)   |
| Fe1 | -N4 | -C9  | -C8  | -3.0(6)   |
| Fe1 | -N4 | -C9  | -C10 | 176.9(4)  |
| N5  | -N4 | -C9  | -C8  | -179.7(4) |
| N5  | -N4 | -C9  | -C10 | 0.2(6)    |
| N4  | -N5 | -C11 | -C10 | 1.4(7)    |
| C12 | -N6 | -N7  | -Fe1 | 175.0(4)  |
| C12 | -N6 | -N7  | -C14 | 0.4(6)    |
| N7  | -N6 | -C12 | -C13 | 0.1(7)    |
| Fe1 | -N7 | -C14 | -C13 | -176.8(4) |
| Fe1 | -N7 | -C14 | -C15 | 4.0(6)    |
| N6  | -N7 | -C14 | -C13 | -0.7(6)   |



Table S7 - Torsion Angles (Degrees) (continued)  
for: bpp in P -1

|     |      |      |      |           |
|-----|------|------|------|-----------|
| N6  | -N7  | -C14 | -C15 | -180.0(5) |
| Fe1 | -N8  | -C15 | -C14 | 4.2(6)    |
| Fe1 | -N8  | -C15 | -C16 | -177.9(4) |
| C19 | -N8  | -C15 | -C14 | -178.1(5) |
| C19 | -N8  | -C15 | -C16 | -0.2(8)   |
| Fe1 | -N8  | -C19 | -C18 | 177.8(4)  |
| Fe1 | -N8  | -C19 | -C20 | -2.7(6)   |
| C15 | -N8  | -C19 | -C18 | 0.2(8)    |
| C15 | -N8  | -C19 | -C20 | 179.6(5)  |
| Fe1 | -N9  | -N10 | -C22 | 179.9(4)  |
| C20 | -N9  | -N10 | -C22 | -0.2(6)   |
| Fe1 | -N9  | -C20 | -C19 | 2.0(6)    |
| Fe1 | -N9  | -C20 | -C21 | 179.6(4)  |
| N10 | -N9  | -C20 | -C19 | -177.9(4) |
| N10 | -N9  | -C20 | -C21 | -0.4(6)   |
| N9  | -N10 | -C22 | -C21 | 0.7(6)    |
| N1  | -C1  | -C2  | -C3  | -0.1(6)   |
| C1  | -C2  | -C3  | -N2  | 0.1(6)    |
| C1  | -C2  | -C3  | -C4  | -179.0(6) |
| N2  | -C3  | -C4  | -N3  | -1.3(7)   |
| N2  | -C3  | -C4  | -C5  | 178.8(5)  |
| C2  | -C3  | -C4  | -N3  | 177.7(6)  |
| C2  | -C3  | -C4  | -C5  | -2.2(9)   |
| N3  | -C4  | -C5  | -C6  | 0.6(8)    |
| C3  | -C4  | -C5  | -C6  | -179.5(5) |
| C4  | -C5  | -C6  | -C7  | -1.2(9)   |
| C5  | -C6  | -C7  | -C8  | 0.6(9)    |
| C6  | -C7  | -C8  | -N3  | 0.7(8)    |

Table S7 - Torsion Angles (Degrees) (continued)  
for: bpp in P -1

|     |      |      |      |           |
|-----|------|------|------|-----------|
| C6  | -C7  | -C8  | -C9  | -179.7(6) |
| N3  | -C8  | -C9  | -N4  | 4.2(7)    |
| N3  | -C8  | -C9  | -C10 | -175.6(6) |
| C7  | -C8  | -C9  | -N4  | -175.5(5) |
| C7  | -C8  | -C9  | -C10 | 4.7(10)   |
| N4  | -C9  | -C10 | -C11 | 0.7(7)    |
| C8  | -C9  | -C10 | -C11 | -179.5(6) |
| C9  | -C10 | -C11 | -N5  | -1.2(7)   |
| N6  | -C12 | -C13 | -C14 | -0.5(7)   |
| C12 | -C13 | -C14 | -N7  | 0.8(7)    |
| C12 | -C13 | -C14 | -C15 | 179.9(6)  |
| N7  | -C14 | -C15 | -N8  | -5.3(7)   |
| N7  | -C14 | -C15 | -C16 | 176.9(6)  |
| C13 | -C14 | -C15 | -N8  | 175.6(6)  |
| C13 | -C14 | -C15 | -C16 | -2.2(10)  |
| N8  | -C15 | -C16 | -C17 | 1.2(9)    |
| C14 | -C15 | -C16 | -C17 | 178.8(6)  |
| C15 | -C16 | -C17 | -C18 | -2.1(10)  |
| C16 | -C17 | -C18 | -C19 | 2.0(10)   |
| C17 | -C18 | -C19 | -N8  | -1.1(9)   |
| C17 | -C18 | -C19 | -C20 | 179.6(6)  |
| N8  | -C19 | -C20 | -N9  | 0.3(7)    |
| N8  | -C19 | -C20 | -C21 | -176.5(6) |
| C18 | -C19 | -C20 | -N9  | 179.8(5)  |
| C18 | -C19 | -C20 | -C21 | 3.0(10)   |
| N9  | -C20 | -C21 | -C22 | 0.8(6)    |
| C19 | -C20 | -C21 | -C22 | 177.8(6)  |
| C20 | -C21 | -C22 | -N10 | -0.9(7)   |

Table S8 - Contact Distances(Angstrom)  
for: bpp in P -1

|     |         |          |     |        |          |
|-----|---------|----------|-----|--------|----------|
| Se1 | .N5_a   | 3.394(6) | N6  | .N12   | 2.816(7) |
| Se1 | .C18_n  | 3.785(7) | N6  | .C22_b | 3.358(7) |
| Se2 | .N10_b  | 3.359(6) | N7  | .N2    | 3.246(6) |
| Se2 | .C5_p   | 3.700(6) | N7  | .N8    | 2.600(6) |
| Se1 | .H16_o  | 3.2500   | N7  | .N4    | 3.212(6) |
| Se1 | .H18_n  | 3.2100   | N7  | .C15   | 2.367(7) |
| Se1 | .H5N_a  | 2.5500   | N8  | .C20   | 2.329(7) |
| Se1 | .H13_o  | 3.2400   | N8  | .N9    | 2.582(6) |
| Se1 | .H12_m  | 3.3000   | N8  | .C14   | 2.353(7) |
| Se2 | .H7_q   | 3.0100   | N8  | .N7    | 2.600(6) |
| Se2 | .H10N_b | 2.5000   | N9  | .N8    | 2.582(6) |
| Se2 | .H5_p   | 3.0600   | N9  | .N4    | 3.183(6) |
| N1  | .C11_a  | 3.424(8) | N9  | .C19   | 2.372(7) |
| N1  | .N11    | 2.792(7) | N9  | .N2    | 3.206(6) |
| N2  | .N9     | 3.206(6) | N10 | .Se2_f | 3.359(6) |
| N2  | .C4     | 2.385(7) | N10 | .C24_f | 3.318(8) |
| N2  | .N7     | 3.246(6) | N11 | .N1    | 2.792(7) |
| N2  | .N3     | 2.597(6) | N12 | .N6    | 2.816(7) |
| N3  | .N2     | 2.597(6) | N1  | .H22_b | 2.5500   |
| N3  | .C9     | 2.336(7) | N2  | .H22_b | 2.7600   |
| N3  | .N4     | 2.594(6) | N5  | .H12_d | 2.9100   |
| N3  | .C3     | 2.345(7) | N6  | .H1_e  | 2.9200   |
| N4  | .N3     | 2.594(6) | N9  | .H11_a | 2.9300   |
| N4  | .N9     | 3.183(6) | N10 | .H11_a | 2.5900   |
| N4  | .N7     | 3.212(6) | N11 | .H1N   | 1.9400   |
| N4  | .C8     | 2.381(7) | N12 | .H6_q  | 2.8700   |
| N5  | .Se1_c  | 3.394(6) | N12 | .H6N   | 1.9700   |
| N5  | .C23_c  | 3.250(9) | N12 | .H1_e  | 2.7500   |

Table S8 - Contact Distances(Angstrom) (continued)  
for: bpp in P -1

|     |        |           |      |         |        |
|-----|--------|-----------|------|---------|--------|
| C1  | .C10_a | 3.440(8)  | C23  | .H1N    | 2.8400 |
| C1  | .C9_a  | 3.489(8)  | C24  | .H10N_b | 2.6600 |
| C5  | .Se2_g | 3.700(6)  | C24  | .H7_q   | 3.0500 |
| C9  | .C1_e  | 3.489(8)  | C24  | .H6N    | 2.8000 |
| C10 | .C1_e  | 3.440(8)  | H1   | .H6N_a  | 2.4700 |
| C11 | .N1_e  | 3.424(8)  | H1   | .N12_j  | 2.7500 |
| C12 | .C21_b | 3.539(8)  | H1   | .N6_a   | 2.9200 |
| C13 | .C21_b | 3.534(9)  | H1N  | .C23    | 2.8400 |
| C16 | .C23_h | 3.528(9)  | H1N  | .N11    | 1.9400 |
| C18 | .Se1_i | 3.785(7)  | H5   | .C2     | 2.9600 |
| C18 | .C23   | 3.554(10) | H5   | .Se2_g  | 3.0600 |
| C19 | .C23   | 3.598(9)  | H5N  | .C23_c  | 2.6600 |
| C21 | .C13_d | 3.534(9)  | H5N  | .H12_d  | 2.4800 |
| C21 | .C12_d | 3.539(8)  | H5N  | .Se1_c  | 2.5500 |
| C22 | .N6_d  | 3.358(7)  | H6   | .N12_k  | 2.8700 |
| C23 | .C16_o | 3.528(9)  | H6N  | .N12    | 1.9700 |
| C23 | .N5_a  | 3.250(9)  | H6N  | .C24    | 2.8000 |
| C23 | .C18   | 3.554(10) | H6N  | .H1_e   | 2.4700 |
| C23 | .C19   | 3.598(9)  | H7   | .C24_k  | 3.0500 |
| C24 | .N10_b | 3.318(8)  | H7   | .Se2_k  | 3.0100 |
| C1  | .H22_b | 2.9000    | H7   | .C10    | 2.9800 |
| C2  | .H5    | 2.9600    | H10N | .Se2_f  | 2.5000 |
| C10 | .H7    | 2.9800    | H10N | .C24_f  | 2.6600 |
| C13 | .H16   | 2.9800    | H11  | .N9_e   | 2.9300 |
| C21 | .H18   | 2.9900    | H11  | .N10_e  | 2.5900 |
| C22 | .H11_a | 2.7700    | H11  | .C22_e  | 2.7700 |
| C23 | .H16_o | 2.7500    | H12  | .N5_b   | 2.9100 |
| C23 | .H5N_a | 2.6600    | H12  | .H5N_b  | 2.4800 |

Table S8 - Contact Distances(Angstrom) (continued)  
for: bpp in P -1

|     |        |        |     |        |        |
|-----|--------|--------|-----|--------|--------|
| H12 | .Se1_l | 3.3000 | H18 | .Se1_i | 3.2100 |
| H13 | .Se1_h | 3.2400 | H18 | .C21   | 2.9900 |
| H16 | .C13   | 2.9800 | H22 | .C1_d  | 2.9000 |
| H16 | .Se1_h | 3.2500 | H22 | .N2_d  | 2.7600 |
| H16 | .C23_h | 2.7500 | H22 | .N1_d  | 2.5500 |

Table S9 - Hydrogen Bonds (Angstrom, Deg)  
for: bpp in P -1

|     |    |      |    |     |        |        |          |        |       |
|-----|----|------|----|-----|--------|--------|----------|--------|-------|
| N1  | -- | H1N  | .. | N11 | 0.8600 | 1.9400 | 2.792(7) | 171.00 | .     |
| N5  | -- | H5N  | .. | Se1 | 0.8600 | 2.5500 | 3.394(6) | 167.00 | 1_545 |
| N6  | -- | H6N  | .. | N12 | 0.8600 | 1.9700 | 2.816(7) | 168.00 | .     |
| N10 | -- | H10N | .. | Se2 | 0.8600 | 2.5000 | 3.359(6) | 175.00 | 1_655 |
| C11 | -- | H11  | .. | N10 | 0.9300 | 2.5900 | 3.503(8) | 166.00 | 1_545 |
| C22 | -- | H22  | .. | N1  | 0.9300 | 2.5500 | 3.458(7) | 167.00 | 1_655 |

Translation of Symmetry Code to Equiv.Pos

a =[ 1565.00 ] = x,1+y,z  
b =[ 1455.00 ] = -1+x,y,z  
c =[ 1545.00 ] = x,-1+y,z  
d =[ 1655.00 ] = 1+x,y,z  
g =[ 2665.00 ] = 1-x,1-y,-z  
h =[ 2666.00 ] = 1-x,1-y,1-z  
i =[ 2766.00 ] = 2-x,1-y,1-z  
j =[ 1565.00 ] = x,1+y,z  
k =[ 2655.00 ] = 1-x,-y,-z  
l =[ 1445.00 ] = -1+x,-1+y,z  
m =[ 1665.00 ] = 1+x,1+y,z  
n =[ 2766.00 ] = 2-x,1-y,1-z  
o =[ 2666.00 ] = 1-x,1-y,1-z  
p =[ 2665.00 ] = 1-x,1-y,-z  
q =[ 2655.00 ] = 1-x,-y,-z
